# Supplementary material
Source: PubMed Central journal article supplement (PMC9425289)
Supplement: jamapediatr-e223079-s001.pdf [file jamapediatr-e223079-s001.pdf]

## Supplemental Online Content

Muthusamy S, Wagh D, Tan J, Bulsara M, Rao S. Utility of the Ages and Stages Questionnaire to identify developmental delay in children aged 12 to 60 months: a systematic review and meta-analysis. *JAMA Pediatr*. Published online August 29, 2022. doi:10.1001/jamapediatrics.2022.3079

**eFigure 1.** PRISMA flow diagram of study selection

**eTable 1.** Characteristics of included studies that used “>2SD below the mean” cut-off for ASQ

**eTable 2.** Characteristics of included studies that used “>1SD below the mean” cut-off for ASQ

**eFigure 2.** Risk of Bias of included studies-summary graph

**eFigure 3.** Methodological Quality of included studies

**eFigure 4.** SROC for ASQ-2SD to predict “any delay”

**eFigure 5.** Diagnostic Odds Ratio of ASQ-2SD to predict “any delay”

**eFigure 6.** Funnel plot for publication bias (ASQ-2SD to predict “any delay”)

**eFigure 7.** Fagan nomogram if baseline prevalence of “any delay” is 5% (ASQ-2SD to predict “any delay”)

**eTable 3.** Post-test probabilities for various pre-test prevalence of “any delay” based on the results of ASQ-2SD

**eFigure 8.** SROC ASQ-2SD to predict “severe delay”

**eFigure 9.** Diagnostic Odds Ratio of ASQ-2SD to predict “severe delay”

**eFigure 10.** Funnel plot for publication bias (ASQ-2SD to predict “severe delay”)

**eFigure 11.** Fagan nomogram if baseline prevalence of “severe delay” is 5% (ASQ-2SD to predict “severe delay”)

**eTable 4.** Post-test probabilities for various pre-test prevalence of “severe delay” based on the results of ASQ-2SD

**eTable 5.** Results of studies included in the systematic review, but could not be pooled in the meta-analysis

**eTables 6-17.** Summary of findings tables and Certainty of Evidence

**eTable 18.** Results of sensitivity analyses

This supplemental material has been provided by the authors to give readers additional information about their work.

eFigure1. PRISMA flow diagram of study selection

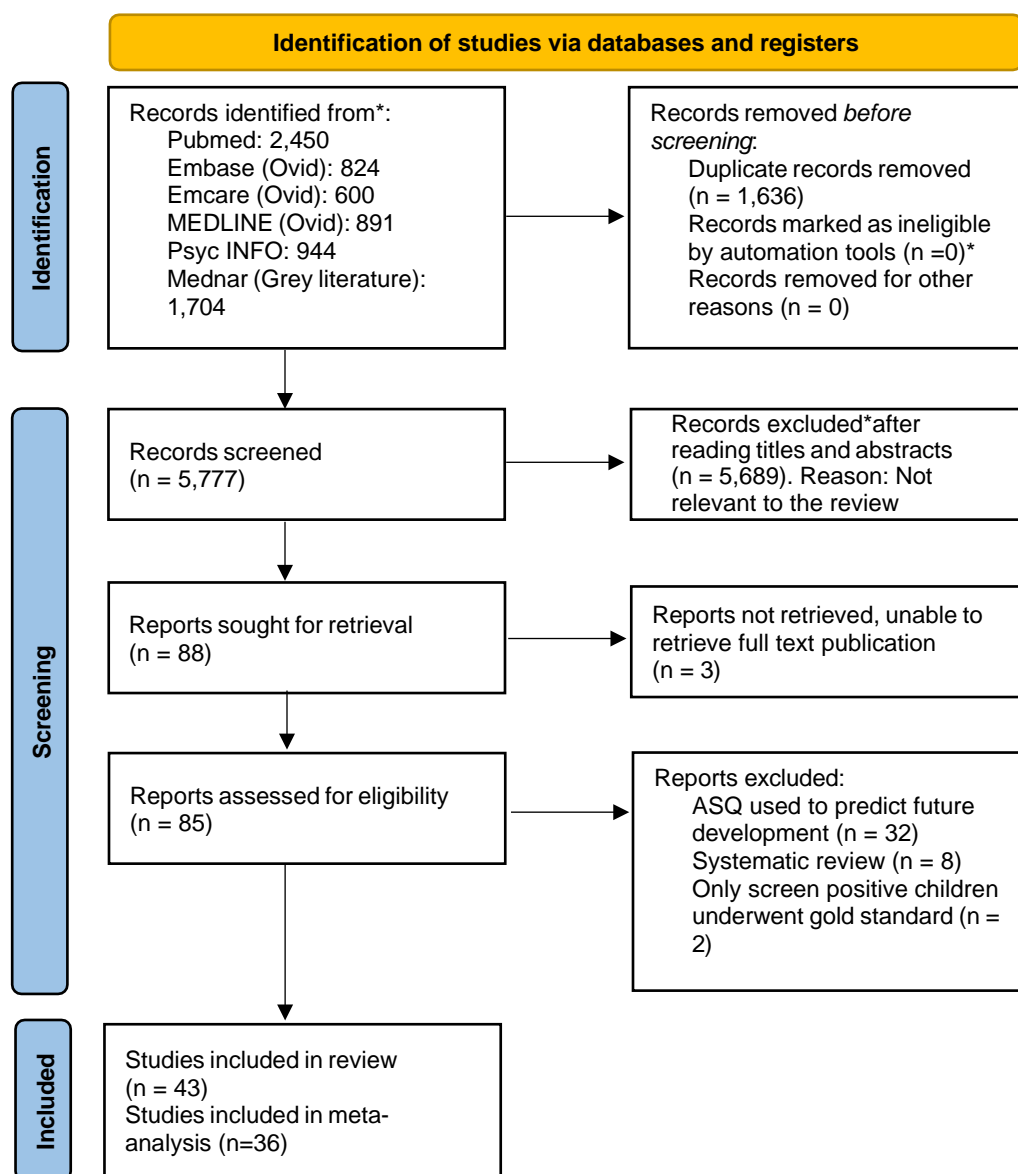

\*No automation tools were used

From: Page MJ, McKenzie JE, Bossuyt PM, Boutron I, Hoffmann TC, Mulrow CD, et al. The PRISMA 2020 statement: an updated guideline for reporting systematic reviews. *BMJ* 2021;372:n71. doi: 10.1136/bmj.n71

For more information, visit: <http://www.prisma-statement.org/>

eTable1. Characteristics of the included studies that used “&gt;2SD below the mean” cut-off for ASQ

| Study ID                                             | Sample size | Study Design | Funding                                                 | Study Population                                                                                                           | Age at Assessment (months) | Index Test                                    | Reference Standard Test                                                       |
|------------------------------------------------------|-------------|--------------|---------------------------------------------------------|----------------------------------------------------------------------------------------------------------------------------|----------------------------|-----------------------------------------------|-------------------------------------------------------------------------------|
| <b>Agarwal_2016<sup>34</sup></b><br><b>Singapore</b> | 141         | Prospective  | National Medical Research Council, Singapore            | Preterm/VLBW survivors with birthweight ≤1250g without major congenital malformations                                      | 24 months                  | ASQ3<br>Delay:<br>2SD<br>Domain:<br>Any       | Bayley-III<br>Delay: 2SD; Bayley-III Subscale<70<br>Domain: Any               |
| <b>Bian_2012A<sup>35</sup></b><br><b>China</b>       | 269         | Prospective  | Grant for Renewing the Public Health System in Shanghai | Children ages 3 to 5 years old, using a stratified sampling method based on the most recent Shanghai census reports        | 6 to 30 months             | ASQ3,<br>Chinese<br>Delay: 2SD<br>Domain: Any | BSID (2 <sup>nd</sup> Edition)<br>Delay: 2SD; BSID Subscale<75<br>Domain: Any |
| <b>Bian_2012B<sup>35</sup></b><br><b>China</b>       | 253         | Prospective  | Grant for Renewing the Public Health System in Shanghai | Children ages 3 months to 5 years old, using a stratified sampling method based on the most recent Shanghai census reports | 8 to 60 months             | ASQ3,<br>Chinese<br>Delay: 2SD<br>Domain: Any | DDST (2 <sup>nd</sup> Edition)<br>Delay: 2SD; DDST Subscale<70<br>Domain: Any |

|                                                        |     |               |                                                                                             |                                                                                       |                   |                                                          |                                                                            |
|--------------------------------------------------------|-----|---------------|---------------------------------------------------------------------------------------------|---------------------------------------------------------------------------------------|-------------------|----------------------------------------------------------|----------------------------------------------------------------------------|
| <b>Carmichael_2014A<sup>36</sup></b><br><b>USA</b>     | 27  | Retrospective | Information not available                                                                   | Children aged 18 to 59 months (mean=41.52 months) with and without known disabilities | Mean of 42 months | ASQ3<br>Delay: 2SD<br>Domain: Gross motor                | PDMS (2nd Edition)<br>Delay: 1SD<br>Domain: Gross motor                    |
| <b>Carmichael_2014B<sup>36</sup></b><br><b>USA</b>     | 27  | Retrospective | Information not available                                                                   | Children aged 18 to 59 months (mean=42 months) with and without known disabilities    | Mean of 42 months | ASQ3<br>Delay: 2SD<br>Domain: Gross motor                | PDMS (2nd Edition)<br>Delay: 2SD<br>Domain: Gross motor                    |
| <b>Carmichael_2014C<sup>36</sup></b><br><b>USA</b>     | 27  | Retrospective | Information not available                                                                   | Children aged 18 to 59 months (mean=42 months) with and without known disabilities    | Mean of 42 months | ASQ3<br>Delay: 2SD<br>Domain: Fine motor                 | PDMS (2nd Edition)<br>Delay: 1SD<br>Domain: Fine motor                     |
| <b>Colbert_2021<sup>37</sup> #</b><br><b>Gautemala</b> | 847 | Prospective   | National Institute of Allergy and Infectious Diseases (NIAID).                              | Children with postnatally acquired Zika virus 0 to 5 years of age                     | 0-5 years         | ASQ3, Spanish<br>Delay: Standard Z-scores<br>Domain: Any | Mullen Scales of Early Learning<br>Delay: Standard T-scores<br>Domain: any |
| <b>Fauls_2020A<sup>38</sup></b><br><b>Australia</b>    | 84  | Prospective   | Funding Information not available. Authors declared that there was no conflict of interest. | Children aged 0 to 5 years attending specialist clinic                                | 27±18 months      | ASQ3<br>Delay: 2SD<br>Domain: Gross motor                | NSMDA<br>Delay: 1SD; Total score>12<br>Domain: Gross motor                 |

|                                                        |     |               |                                                                                             |                                                                         |                  |                                           |                                                                           |
|--------------------------------------------------------|-----|---------------|---------------------------------------------------------------------------------------------|-------------------------------------------------------------------------|------------------|-------------------------------------------|---------------------------------------------------------------------------|
| <b>Flamant_2011<sup>4</sup></b><br><b>France</b>       | 703 | Prospective   | Pays de Loire network of care from Assurance Maladie                                        | Very preterm infants (<35 weeks gestational age)                        | 24 months        | ASQ2<br>Delay: 2SD<br>Domain: Any         | Revised Brunet-Lezine test<br>Delay: 1SD<br>Domain: Any                   |
| <b>Fuengfoo_2020<sup>39</sup> #</b><br><b>Thailand</b> | 100 | Prospective   | Funding Information not available. Authors declared that there was no conflict of interest. | Children who visited the Well Child Clinic and Child Development Center | 12 to 36 months  | ASQ3<br>Delay: 2SD<br>Domain: Any         | Bayley-III<br>Delay: 2SD<br>Domain: Any                                   |
| <b>Ga_2011A<sup>40</sup></b><br><b>Korea</b>           | 111 | Retrospective | Information not available                                                                   | Children aged 4 to 60-months who visited the rehabilitation clinic      | 17.5±12.0 months | ASQ2, Korean<br>Delay: 2SD<br>Domain: Any | DDST (2 <sup>nd</sup> Edition)<br>Delay: 2SD<br>Domain: Any               |
| <b>Ga_2011B<sup>40</sup> #</b><br><b>Korea</b>         | 141 | Retrospective | Information not available                                                                   | Children aged 4 to 60-months who visited the rehabilitation clinic      | 17.5±12.0 months | ASQ2, Korean<br>Delay: 2SD<br>Domain: Any | Capute Scale<br>Delay: 2SD; DQ below 75<br>Domain: Cognitive and language |
| <b>Ga_2011C<sup>40</sup> #</b><br><b>Korea</b>         | 141 | Retrospective | Information not available                                                                   | 4-months to 60-months-olds who visited the rehabilitation clinic        | 17.5±12.0 months | ASQ2, Korean<br>Delay: 2SD<br>Domain: Any | Capute Scale<br>Delay: 1SD; DQ below 85<br>Domain: Cognitive and language |

|                                              |    |               |                                                                                                                                                                                                                                                     |                                                                                                          |                  |                                           |                                                                                  |
|----------------------------------------------|----|---------------|-----------------------------------------------------------------------------------------------------------------------------------------------------------------------------------------------------------------------------------------------------|----------------------------------------------------------------------------------------------------------|------------------|-------------------------------------------|----------------------------------------------------------------------------------|
| <b>Ga_2011D<sup>40</sup> #<br/>Korea</b>     | 69 | Retrospective | Information not available                                                                                                                                                                                                                           | 4-months to 60-months-olds who visited the rehabilitation clinic                                         | 17.5±12.0 months | ASQ2, Korean<br>Delay: 2SD<br>Domain: Any | AIMS<br>Delay: 1SD; 10 <sup>th</sup> percentile<br>Domain: Motor                 |
| <b>Gollenberg_2009A<sup>41</sup><br/>USA</b> | 53 | Prospective   | Great Lakes Protection Fund, the Agency for Toxic substances and Disease registry, the Gerber Foundation, intramural funds from the Eunice Kennedy Shriver National Institute of Child Health and Human Development, National Institutes of Health. | Infants born to mothers who participated in the New York State Angler Cohort Prospective Pregnancy Study | 24 months        | ASQ2<br>Delay: 2SD<br>Domain: Any         | BSID (2 <sup>nd</sup> Edition)<br>Delay: 1SD;<br>Subscale<85<br>Domain: Any      |
| <b>Gollenberg_2009B<sup>41</sup><br/>USA</b> | 53 | Prospective   | Great Lakes Protection Fund, the Agency for Toxic substances and Disease registry, the Gerber Foundation, intramural funds from the Eunice Kennedy Shriver National Institute of Child Health and Human Development, National Institutes of Health. | Infants born to mothers who participated in the New York State Angler Cohort Prospective Pregnancy Study | 24 months        | ASQ2<br>Delay: 2SD<br>Domain: Any         | BSID (2 <sup>nd</sup> Edition)<br>Delay: 2SD; BSID<br>Subscale<70<br>Domain: Any |

|                                                              |      |               |                           |                                                                                                                                                                                                           |                                                        |                                                                                            |                                                                                                                       |
|--------------------------------------------------------------|------|---------------|---------------------------|-----------------------------------------------------------------------------------------------------------------------------------------------------------------------------------------------------------|--------------------------------------------------------|--------------------------------------------------------------------------------------------|-----------------------------------------------------------------------------------------------------------------------|
| <b>Gutierrez-Cruz_2019<sup>42</sup></b><br>#<br><b>Spain</b> | 88   | Prospective   | Information not available | Late preterm and Term                                                                                                                                                                                     | 24 months                                              | ASQ3<br>Delay: Unsure<br>Domain:<br>Individual<br>domains                                  | Brunet-Lezine Revised<br>test<br>Delay: DQ score<br>Domain:<br>Corresponding<br>individual domains                    |
| <b>Halbwachs_2013<sup>43</sup></b> #<br><b>Germany</b>       | ?452 | Prospective   | No support or Funding     | Preterm infants ( $\leq 35$<br>weeks of gestation)<br>recruited.                                                                                                                                          | 60months                                               | ASQ, (ASQ<br>version unclear)<br>Delay: Overall<br>scores of 270<br>and 285<br>Domain: Any | WPPSI (3 <sup>rd</sup> Edition)<br>Delay; 1SD; IQ<85<br>Domain: Any                                                   |
| <b>Jang_2019<sup>44</sup></b><br><b>Korea</b>                | 145  | Retrospective | No funding                | Infants recruited from<br>outpatient developmental<br>clinic.                                                                                                                                             | 4 to 71 months<br>(Mean:<br>39.1 $\pm$ 16.4<br>months) | ASQ2, Korean<br>Delay: 2SD<br>Domain: Any                                                  | BSID (Korean, 2 <sup>nd</sup><br>Edition) and WPPSI<br>(Korean, 3 <sup>rd</sup> edition)<br>Delay: 2SD<br>Domain: Any |
| <b>Juneja_2011A<sup>45</sup></b><br><b>India</b>             | 50   | Prospective   | No funding                | Recruited High Risk<br>group (n=20) :<br>Birthweight <2 kg,<br>gestation age <37<br>weeks, CNS infection,<br>genetic syndromes, CP,<br>develop delay; and low<br>risk group (n = 30) : no<br>risk factors | 18 months                                              | ASQ2<br>Delay: 2SD<br>Domain: Any                                                          | DASII<br>Delay: 2SD; DQ<70<br>Domain: Any                                                                             |

|                                                           |     |             |                                                                                             |                                                                                                                                                                                   |                |                                            |                                                                                                   |
|-----------------------------------------------------------|-----|-------------|---------------------------------------------------------------------------------------------|-----------------------------------------------------------------------------------------------------------------------------------------------------------------------------------|----------------|--------------------------------------------|---------------------------------------------------------------------------------------------------|
| <b>Juneja_2011B<sup>45</sup></b><br><b>India</b>          | 50  | Prospective | No funding                                                                                  | Recruited High Risk group (n=20) : Birthweight <2 kg, gestation age <37 weeks, CNS infection, genetic syndromes, CP, develop delay; and low risk group (n = 30) : no risk factors | 24 months      | ASQ2<br>Delay: 2SD<br>Domain: Any          | DASII<br>Delay: 2SD; DQ<70<br>Domain: Any                                                         |
| <b>Kapci_2010<sup>46</sup></b><br><b>Turkey</b>           | 833 | Prospective | Scientific and Technical Research Council of Turkey                                         | Children from preschool, special education school, hospitals, and community centres (both risk and normal population)                                                             | 3 to 72 months | ASQ2, Turkish<br>Delay: 2SD<br>Domain: Any | DDST (2 <sup>nd</sup> Edition),<br>GECDAS, or ADISI<br>Delay: 1SD<br>Domain: Any                  |
| <b>Kerstjens_2015A<sup>47</sup></b><br><b>Netherlands</b> | 224 | Prospective | The Netherlands Organization for Health Research and Development Cost-Effectiveness Program | Infants born <32 weeks without major congenital anomalies                                                                                                                         | 24 months      | ASQ3<br>Delay: 2SD<br>Domain: Any          | Bayley-III or any of blindness, deafness, CP<br>Delay: 1SD; Bayley-III Subscale<85<br>Domain: Any |
| <b>Kerstjens_2015B<sup>47</sup></b><br><b>Netherlands</b> | 224 | Prospective | The Netherlands Organization for Health Research and Development Cost-Effectiveness Program | Infants born <32 weeks without major congenital anomalies                                                                                                                         | 24 months      | ASQ3<br>Delay: 2SD<br>Domain: Any          | Bayley-III or any of blindness, deafness, CP<br>Delay: 2SD; Bayley-III Subscale<70<br>Domain: Any |



|                                                         |     |               |                                                                                             |                                                               |                 |                                                       |                                                                                                |
|---------------------------------------------------------|-----|---------------|---------------------------------------------------------------------------------------------|---------------------------------------------------------------|-----------------|-------------------------------------------------------|------------------------------------------------------------------------------------------------|
| <b>Kim_2016<sup>48</sup></b><br><b>Korea</b>            | 206 | Prospective   | Funding Information not available. Authors declared that there was no conflict of interest. | Children with Language development delay as chief complaint   | Mean: 30 months | ASQ2<br>Delay: 2SD<br>Domain: Communication           | SELSI and PRELS<br>Delay: 2SD<br>Domain: Speech and Language                                   |
| <b>King-Dowling_2015A<sup>50</sup></b><br><b>Canada</b> | 159 | Prospective   | Ontario's Ministry of Child and Youth Services                                              | Children with no known physical impairments with IQ $\geq$ 70 | 43 to 66 months | ASQ3<br>Delay: 2SD<br>Domain: Fine motor, gross motor | MABC (2 <sup>nd</sup> Edition)<br>Delay: 1SD<br>Domain: Fine motor, gross motor                |
| <b>Klamer_2005<sup>51</sup> #</b><br><b>Denmark</b>     | 30  | Prospective   | Dagmar Marshalls fund                                                                       | Native Danish term and preterm infants.                       | 39 months       | ASQ 2<br>Delay: Combined overall score<br>Domain: Any | WPPSI-R<br>Delay: intelligence scores<br>Domain: Cognitive, speech and language                |
| <b>Kwun_2015A<sup>52</sup> #</b><br><b>Korea</b>        | 90  | Retrospective | Funding Information not available. Authors declared that there was no conflict of interest. | Infants < 37 GA                                               | 18 to 24 months | ASQ1<br>Delay: 2SD<br>Domain: Any                     | BSID (2 <sup>nd</sup> Edition)<br>Delay: 1SD; MDI<85<br>Domain: Cognitive, speech and language |
| <b>Kwun_2015B<sup>52</sup> #</b><br><b>Korea</b>        | 90  | Retrospective | Funding Information not available. Authors declared that there was no conflict of interest. | Infants < 37 GA                                               | 18 to 24 months | ASQ1<br>Delay: 2SD<br>Domain: Any                     | BSID (2 <sup>nd</sup> Edition)<br>Delay: 1SD; PDI<85<br>Domain: Fine motor, gross motor domain |

|                                                   |     |             |                                                                                                                                                                                                                     |                                                                       |                    |                                   |                                                                                                                                                                                           |
|---------------------------------------------------|-----|-------------|---------------------------------------------------------------------------------------------------------------------------------------------------------------------------------------------------------------------|-----------------------------------------------------------------------|--------------------|-----------------------------------|-------------------------------------------------------------------------------------------------------------------------------------------------------------------------------------------|
| <b>Lepine_2021A<sup>53</sup></b><br><b>Canada</b> | 64  | Prospective | Scholarship awarded to Mr Lépine by the Programme d'Excellence en Médecine pour l'Initiation En Recherche of the Faculty of medicine of the Université de Montréal and by the Heart and Stroke Foundation of Canada | Term infants who underwent surgical repair within first year of life. | 12 months          | ASQ3<br>Delay: 2SD<br>Domain: Any | Bayley-III<br>Delay: 1SD<br>Domain: Any                                                                                                                                                   |
| <b>Lepine_2021B<sup>53</sup></b><br><b>Canada</b> | 82  | Prospective | Scholarship awarded to Mr Lépine by the Programme d'Excellence en Médecine pour l'Initiation En Recherche of the Faculty of medicine of the Université de Montréal and by the Heart and Stroke Foundation of Canada | Term infants who underwent surgical repair within first year of life. | 24 months          | ASQ3<br>Delay: 2SD<br>Domain: Any | Bayley-III<br>Delay: 1SD<br>Domain: Any                                                                                                                                                   |
| <b>Limbos_2011<sup>54</sup></b><br><b>Canada</b>  | 331 | Prospective | Funding Information not available. Authors declared that there was no conflict of interest.                                                                                                                         | Children presented to their primary care provider for routine care    | 32.3 ± 16.3 months | ASQ2<br>Delay: 2SD<br>Domain: Any | Bayley-III and/ or WPPSI (3 <sup>rd</sup> Edition) and/ or VABS (2 <sup>nd</sup> Edition) and/or PLS (4 <sup>th</sup> Edition)<br>Delay: 1SD; <10 <sup>th</sup> percentile<br>Domain: Any |

|                                                       |     |               |                                                                                                                                                                    |                                                                                                                                                                                                                                                               |               |                                                |                                                                       |
|-------------------------------------------------------|-----|---------------|--------------------------------------------------------------------------------------------------------------------------------------------------------------------|---------------------------------------------------------------------------------------------------------------------------------------------------------------------------------------------------------------------------------------------------------------|---------------|------------------------------------------------|-----------------------------------------------------------------------|
| <b>Lindsay_2008A<sup>55</sup></b><br><b>Australia</b> | 32  | Prospective   | National Health and Medical Research Council of Australia                                                                                                          | Infants $\geq 34$ weeks GA at birth with perinatal asphyxia                                                                                                                                                                                                   | 12 months     | ASQ1<br>Delay: 2SD<br>Domain: Any              | BSID (2 <sup>nd</sup> Edition)<br>Delay: 1SD (PDI/MDI)<br>Domain: Any |
| <b>Lindsay_2008B<sup>55</sup></b><br><b>Australia</b> | 32  | Prospective   | National Health and Medical Research Council of Australia                                                                                                          | Infants $\geq 34$ weeks GA at birth with perinatal asphyxia                                                                                                                                                                                                   | 12 months     | ASQ1<br>Delay: 2SD<br>Domain: Any              | BSID (2 <sup>nd</sup> Edition)<br>Delay: 2SD (PDI/MDI)<br>Domain: Any |
| <b>Mackin_2017<sup>56</sup></b><br><b>Canada</b>      | 67  | Retrospective | Undergraduate Research Opportunity Program Award (University of Ottawa), 2012 Summer Studentship Award (Children's Hospital of Eastern Ontario Research Institute) | Infants born <29 weeks                                                                                                                                                                                                                                        | 18 months     | ASQ3<br>Delay: 2SD<br>Domain: Any              | Bayley-III<br>Delay: 1SD<br>Domain: Any                               |
| <b>Mezawa_2019<sup>20</sup></b><br><b>Japan</b>       | 308 | Prospective   | Ministry of the Environment, Japan.                                                                                                                                | Participants from Japan Environment and Children's Study pilot study preterm/ term at birth, low risk as well as high risk groups and patients who attended the National Center for Child Health and Development and the Nico Children Clinic in Tokyo, Japan | 6 to 60months | ASQ3,<br>Japanese<br>Delay: 2SD<br>Domain: Any | KSPD or DDST (2 <sup>nd</sup> Edition)<br>Delay: 2SD<br>Domain: Any   |

|                                                        |     |             |                                                                                                                                     |                                                                                                                         |              |                                                  |                                                         |
|--------------------------------------------------------|-----|-------------|-------------------------------------------------------------------------------------------------------------------------------------|-------------------------------------------------------------------------------------------------------------------------|--------------|--------------------------------------------------|---------------------------------------------------------|
| <b>Noeder_2017A<sup>57</sup></b><br><b>USA</b>         | 239 | Prospective | Institutional Development Award (IDeA) from the National Institute of General Medical Sciences of the National Institutes of Health | Children with congenital heart disease underwent cardiac surgery during infancy                                         | 6 -36 months | ASQ3<br>Delay: 2SD<br>Domain:<br>Problem solving | Bayley-III<br>Delay: 1SD<br>Domain: Cognitive           |
| <b>Noeder_2017B<sup>57</sup></b><br><b>USA</b>         | 228 | Prospective | Institutional Development Award (IDeA) from the National Institute of General Medical Sciences of the National Institutes of Health | children with congenital heart disease underwent cardiac surgery during infancy                                         | 6 -36 months | ASQ3<br>Delay: 2SD<br>Domain:<br>Communication   | Bayley-III<br>Delay: 1SD<br>Domain: Speech and language |
| <b>Noeder_2017C<sup>57</sup></b><br><b>USA</b>         | 242 | Prospective | Institutional Development Award (IDeA) from the National Institute of General Medical Sciences of the National Institutes of Health | children with congenital heart disease underwent cardiac surgery during infancy                                         | 6 -36 months | ASQ3<br>Delay: 2SD<br>Domain: Fine motor         | Bayley-III<br>Delay: 1SD<br>Domain: Fine motor          |
| <b>Noeder_2017D<sup>57</sup></b><br><b>USA</b>         | 244 | Prospective | Institutional Development Award (IDeA) from the National Institute of General Medical Sciences of the National Institutes of Health | children with congenital heart disease underwent cardiac surgery during infancy                                         | 6 -36 months | ASQ3<br>Delay: 2SD<br>Domain: Gross motor        | Bayley-III<br>Delay: 1SD<br>Domain: Gross motor         |
| <b>O'Connor_2020A<sup>58</sup></b><br><b>Australia</b> | 65  | Prospective | No Funding                                                                                                                          | Infants born to women reporting methamphetamine use during pregnancy<br><br>Individual patient data provided by authors | 12 months    | ASQ3<br>Delay: 2SD<br>Domain: Any                | GMDS<br>Delay: 1SD; GQ<85<br>Domain: Any                |

|                                                        |     |             |                                                                               |                                                                                                                         |                                         |                                                                              |                                                                                                                 |
|--------------------------------------------------------|-----|-------------|-------------------------------------------------------------------------------|-------------------------------------------------------------------------------------------------------------------------|-----------------------------------------|------------------------------------------------------------------------------|-----------------------------------------------------------------------------------------------------------------|
| <b>O'Connor_2020B<sup>58</sup></b><br><b>Australia</b> | 65  | Prospective | No Funding                                                                    | Infants born to women reporting methamphetamine use during pregnancy<br><br>Individual patient data provided by authors | 12 months                               | ASQ3<br>Delay: 2SD<br>Domain: Any                                            | GMDS<br>Delay: 2SD; GQ<70<br>Domain: Any                                                                        |
| <b>Otalvaro_2018<sup>59</sup></b><br><b>Argentina</b>  | 630 | Prospective | No funding                                                                    | Children who attended the routine health care check-up                                                                  | 1-66 months (median age appr 20 months) | ASQ3<br>Delay: 2SD<br>Domain: Any                                            | PRUNAPE<br>Delay: 1SD; not documented<br>Domain: Any                                                            |
| <b>Schonhaut_2013<sup>60</sup></b><br><b>Chile</b>     | 196 | Prospective | Clinica Alemana research grants program and National Fund for Health Research | Preterm and Term infants from routine well child clinic                                                                 | 18months to 30 months                   | ASQ3<br>Delay: 2SD<br>Domain: Any                                            | Bayley-III<br>Delay: 1SD<br>Domain: Any                                                                         |
| <b>Sheldrick_2020<sup>61</sup></b><br><b>USA</b>       | 482 | Prospective | National Institute of Child Health and Development (NICHD)                    | consecutive parents in waiting rooms at 10 pediatric primary care offices                                               | 9 to 42 months                          | ASQ3<br>Delay: 2SD<br>Domain: Any                                            | Bayley-III<br>Delay: 1SD<br>Domain: Any                                                                         |
| <b>Simard_2012A<sup>62</sup></b><br><b>Canada</b>      | 121 | Prospective | Canadian Institutes of Health Research                                        | 29 to 36 <sup>+6</sup> weeks of gestation at birth, BW <2.5Kg                                                           | 12 months                               | ASQ2<br>Delay: 2SD<br>Domain: Problem solving, communication personal-social | BSID (2 <sup>nd</sup> Edition)<br>Delay: 1SD; MDI<85<br>Domain: Cognitive, speech and language, personal-social |

|                                                      |     |             |                                                                                                                                                                                                                                                                                              |                                                                       |                |                                                                               |                                                                                                                 |
|------------------------------------------------------|-----|-------------|----------------------------------------------------------------------------------------------------------------------------------------------------------------------------------------------------------------------------------------------------------------------------------------------|-----------------------------------------------------------------------|----------------|-------------------------------------------------------------------------------|-----------------------------------------------------------------------------------------------------------------|
| <b>Simard_2012B<sup>62</sup></b><br><b>Canada</b>    | 119 | Prospective | Canadian Institutes of Health Research                                                                                                                                                                                                                                                       | 29 to 36 <sup>+6</sup> weeks of gestation at birth, BW <2.5Kg         | 12 months      | ASQ2<br>Delay: 2SD<br>Domain: Gross motor, fine motor                         | BSID (2 <sup>nd</sup> Edition)<br>Delay: 1SD; PDI<85<br>Domain: Gross motor, fine motor                         |
| <b>Simard_2012C<sup>62</sup></b><br><b>Canada</b>    | 109 | Prospective | Canadian Institutes of Health Research                                                                                                                                                                                                                                                       | 29 to 36 <sup>+6</sup> weeks of gestation at birth, BW <2.5Kg         | 24 months      | ASQ2<br>Delay: 2SD<br>Domain: Problem solving, communication, personal social | BSID (2 <sup>nd</sup> Edition)<br>Delay: 1SD; MDI<85<br>Domain: Cognitive, speech and language, personal-social |
| <b>Simard_2012D<sup>62</sup></b><br><b>Canada</b>    | 107 | Prospective | Canadian Institutes of Health Research                                                                                                                                                                                                                                                       | 29 to 36 <sup>+6</sup> weeks of gestation at birth, BW <2.5Kg         | 24 months      | ASQ2<br>Delay: 2SD<br>Domain: Gross motor, fine motor                         | BSID (2 <sup>nd</sup> Edition)<br>Delay: 1SD; PDI<85<br>Domain: Gross motor, fine motor                         |
| <b>Simpson_2021<sup>19</sup></b><br><b>Australia</b> | 124 | Prospective | Northern Territory Department of Education, NHMRC Project Grant (107833) and the Channel 7 Children's Research Foundation, Australian Government Research Training Program Scholarship, a Jack Keating Fund Scholarship, and a Science of Learning Research Centre PhD grant and ARC Science | Central Australian Aboriginal children between 2 to 48 months of age. | 2 to 48 months | ASQ3-TRAK<br>Delay: 2SD<br>Domain: Any                                        | Bayley-III<br>or BDI (2 <sup>nd</sup> Edition)<br>Delay: 2SD<br>Domain: Any                                     |

|                                                        |    |             |                             |                                                              |           |                                    |                                                                                                               |
|--------------------------------------------------------|----|-------------|-----------------------------|--------------------------------------------------------------|-----------|------------------------------------|---------------------------------------------------------------------------------------------------------------|
|                                                        |    |             | of Learning Research Centre |                                                              |           |                                    |                                                                                                               |
| <b>Skellern_2001A<sup>63</sup></b><br><b>Australia</b> | 56 | Prospective | Information not available   | Premature < 31 weeks,<br>CA ± 4 weeks of study<br>age groups | 12 months | ASQ1<br>Delay: 2SD<br>Domain: Any  | GMDS (Revised<br>edition)<br>Delay: 1SD<br>Domain: Any                                                        |
| <b>Skellern_2001B<sup>63</sup></b><br><b>Australia</b> | 24 | Prospective | Information not available   | Premature < 31 weeks,<br>CA ± 4 weeks of study<br>age groups | 18 months | ASQ 1<br>Delay: 2SD<br>Domain: Any | BSID (2 <sup>nd</sup> Edition)<br>Delay: 1SD<br>Domain: Cognitive,<br>speech and language,<br>personal-social |
| <b>Skellern_2001C<sup>63</sup></b><br><b>Australia</b> | 43 | Prospective | Information not available   | Premature < 31 weeks,<br>CA ± 4 weeks of study<br>age groups | 24 months | ASQ 1<br>Delay: 2SD<br>Domain: Any | GMDS (Revised<br>edition)<br>Delay: 1SD<br>Domain: Any                                                        |
| <b>Skellern_2001D<sup>63</sup></b><br><b>Australia</b> | 13 | Prospective | Information not available   | Premature < 31 weeks,<br>CA ± 4 weeks of study<br>age groups | 48 months | ASQ 1<br>Delay: 2SD<br>Domain: Any | McCarthy Scale of<br>Infant Abilities - GCI<br>Delay: 1SD<br>Domain: Any                                      |

|                                                          |       |             |                                                                                                         |                                                                                                                                                            |             |                                          |                                                                                        |
|----------------------------------------------------------|-------|-------------|---------------------------------------------------------------------------------------------------------|------------------------------------------------------------------------------------------------------------------------------------------------------------|-------------|------------------------------------------|----------------------------------------------------------------------------------------|
| <b>Smith_2012<sup>64</sup></b><br><b>Australia</b>       | 332   | Prospective | March of Dimes Birth Defects Foundation                                                                 | Infants who had undergone cardiac/non-cardiac surgery and healthy controls                                                                                 | 12 months   | ASQ2<br>Delay: 2SD<br>Domain: Fine motor | Bayley-III<br>Delay: 1SD<br>Domain: Fine motor                                         |
| <b>Squires_1997<sup>3</sup></b><br><b>USA</b>            | 1,511 | Prospective | National Institute on Disability and Rehabilitation Research and the March of Dimes Research Foundation | The sample was composed of children with medical risk factors, environmental risk factors, and a normative sample.                                         | 4-36 months | ASQ2<br>Delay: 2SD<br>Domain: Any        | GADNE (revised edition), BSID I, SBIT, MSCA<br>Delay: 1.5SD<br>Domain: Any             |
| <b>Srinithiwat_2014A<sup>71</sup></b><br><b>Thailand</b> | 30    | Prospective | Funding Information not available. Authors declared that there was no conflict of interest.             | Children who attended the well-child clinic, developmental and behavioural clinic, general paediatric outpatient clinic and inpatient paediatric wards     | 18 months   | ASQ3<br>Delay: 2SD<br>Domain: Any        | DDST (2 <sup>nd</sup> Edition)<br>Delay: 1SD; 2 caution item or 1 delay<br>Domain: Any |
| <b>Srinithiwat_2014B<sup>71</sup></b><br><b>Thailand</b> | 30    | Prospective | Funding Information not available. Authors declared that there was no conflict of interest.             | Children who attended the well child clinic, developmental and behavioural clinic, and general paediatric outpatient clinic and inpatient paediatric wards | 24 months   | ASQ3<br>Delay: 2SD<br>Domain: Any        | DDST (2 <sup>nd</sup> Edition)<br>Delay: 1SD; 2 caution item or 1 delay<br>Domain: Any |
| <b>Srinithiwat_2014C<sup>71</sup></b><br><b>Thailand</b> | 30    | Prospective | Funding Information not available. Authors declared that there was no conflict of interest.             | Children who attended the well child clinic, developmental and behavioural clinic, and general paediatric outpatient clinic and inpatient paediatric wards | 30 months   | ASQ3<br>Delay: 2SD<br>Domain: Any        | DDST (2 <sup>nd</sup> Edition)<br>Delay: 1SD; 2 caution item or 1 delay<br>Domain: Any |



|                                                         |     |             |                                                    |                                                         |                               |                                           |                                                                              |
|---------------------------------------------------------|-----|-------------|----------------------------------------------------|---------------------------------------------------------|-------------------------------|-------------------------------------------|------------------------------------------------------------------------------|
| <b>Steenis_2015A<sup>65</sup></b><br><b>Netherlands</b> | 565 | Prospective | ZonMW                                              | Healthy and at-risk children 18 to 42 months            | 18-42 months                  | ASQ3<br>Delay: 2SD<br>Domain: Any         | Bayley-III<br>Delay: 1SD<br>Domain: Any                                      |
| <b>Steenis_2015B<sup>65</sup></b><br><b>Netherlands</b> | 565 | Prospective | ZonMW                                              | Healthy and at-risk children 18 to 42 months            | 18-42 months                  | ASQ3<br>Delay: 2SD<br>Domain: Any         | Bayley-III<br>Delay: 2SD<br>Domain: Any                                      |
| <b>Vanvuchelen_2017A<sup>66</sup></b><br><b>Belgium</b> | 43  | Prospective | Marguerite-Marie Delacroix grant (Tienen, Belgium) | High-functioning children with autism spectrum disorder | 22-54 months (mean 40 months) | ASQ2<br>Delay: 2SD<br>Domain: Gross motor | PDMS (2 <sup>nd</sup> Edition)<br>Delay: 1SD; Score<7<br>Domain: Gross motor |
| <b>Vanvuchelen_2017B<sup>66</sup></b><br><b>Belgium</b> | 43  | Prospective | Marguerite-Marie Delacroix grant (Tienen, Belgium) | High-functioning children with autism spectrum disorder | 22-54 months (mean 40 months) | ASQ2<br>Delay: 2SD<br>Domain: Gross motor | PDMS (2 <sup>nd</sup> Edition)<br>Delay: 2SD; SS<4<br>Domain: Gross motor    |
| <b>Vanvuchelen_2017C<sup>66</sup></b><br><b>Belgium</b> | 43  | Prospective | Marguerite-Marie Delacroix grant (Tienen, Belgium) | High-functioning children with autism spectrum disorder | 22-54 months (mean 40 months) | ASQ2<br>Delay: 2SD<br>Domain: Fine motor  | PDMS (2 <sup>nd</sup> Edition)<br>Delay: 1SD; Score<7<br>Domain: Fine motor  |
| <b>Vanvuchelen_2017D<sup>66</sup></b><br><b>Belgium</b> | 43  | Prospective | Marguerite-Marie Delacroix grant (Tienen, Belgium) | High-functioning children with autism spectrum disorder | 22-54 months (mean 40 months) | ASQ2<br>Delay: 2SD<br>Domain: Fine motor  | PDMS (2 <sup>nd</sup> Edition)<br>Delay: 2SD; SS<5<br>Domain: Fine motor     |

|                                                       |     |             |                                                                                                                                                                    |                                                                                        |                 |                                                   |                                                             |
|-------------------------------------------------------|-----|-------------|--------------------------------------------------------------------------------------------------------------------------------------------------------------------|----------------------------------------------------------------------------------------|-----------------|---------------------------------------------------|-------------------------------------------------------------|
| <b>Veldhuizen_2015A<sup>67</sup></b><br><b>Canada</b> | 587 | Prospective | Ministry of Children and Youth Services of Ontario                                                                                                                 | Children younger than 2 years and born 4 weeks or more premature                       | 1-36 months     | ASQ3<br>Delay: 2SD<br>Domain: Any                 | Bayley-III<br>Delay: 2SD<br>Domain: Any                     |
| <b>Veldhuizen_2015B<sup>67</sup></b><br><b>Canada</b> | 587 | Prospective | Ministry of Children and Youth Services of Ontario                                                                                                                 | Younger than 2 years and born 4 weeks or more premature                                | 1-36 months     | ASQ 3<br>Delay: 2SD<br>Domain:<br>Problem solving | Bayley-III<br>Delay: 2SD<br>Domain: Cognitive               |
| <b>Veldhuizen_2015C<sup>67</sup></b><br><b>Canada</b> | 587 | Prospective | Ministry of Children and Youth Services of Ontario                                                                                                                 | Younger than 2 years and born 4 weeks or more premature                                | 1-36 months     | ASQ 3<br>Delay: 2SD<br>Domain: Fine motor         | Bayley-III<br>Delay: 2SD<br>Domain: Fine motor              |
| <b>Veldhuizen_2015D<sup>67</sup></b><br><b>Canada</b> | 587 | Prospective | Ministry of Children and Youth Services of Ontario                                                                                                                 | Younger than 2 years and born 4 weeks or more premature                                | 1-36 months     | ASQ 3<br>Delay: 2SD<br>Domain: Gross motor        | Bayley-III<br>Delay: 2SD<br>Domain: Gross motor             |
| <b>Veldhuizen_2015E<sup>67</sup></b><br><b>Canada</b> | 587 | Prospective | Ministry of Children and Youth Services of Ontario                                                                                                                 | Younger than 2 years and born 4 weeks or more premature                                | 1-36 months     | ASQ 3<br>Delay: 2SD<br>Domain:<br>Communication   | Bayley-III<br>Delay: 2SD<br>Domain: Speech and language     |
| <b>Woodward_2011A<sup>68</sup></b><br><b>USA</b>      | 219 | Prospective | National Institute of Child Health and Human Development and grants from the General Clinical Research Centers Programs at the University of New Mexico, Tufts-New | BW between 500-999 grams and the need for mechanical ventilation at 12-48 hours of age | 18 to 22 months | ASQ2<br>Delay: 2SD<br>Domain: Any                 | BSID (2 <sup>nd</sup> Edition)<br>Delay: 1SD<br>Domain: Any |

|                                                      |     |             |                                                                                                                                                                                                                           |                                                                                        |                 |                                               |                                                                                                                                                                         |
|------------------------------------------------------|-----|-------------|---------------------------------------------------------------------------------------------------------------------------------------------------------------------------------------------------------------------------|----------------------------------------------------------------------------------------|-----------------|-----------------------------------------------|-------------------------------------------------------------------------------------------------------------------------------------------------------------------------|
|                                                      |     |             | England Medical Center, and the University of Colorado                                                                                                                                                                    |                                                                                        |                 |                                               |                                                                                                                                                                         |
| <b>Woodward_2011B<sup>68</sup></b><br><b>USA</b>     | 219 | Prospective | National Institute of Child Health and Human Development and grants from the General Clinical Research Centers Programs at the University of New Mexico, Tufts-New England Medical Center, and the University of Colorado | BW between 500-999 grams and the need for mechanical ventilation at 12-48 hours of age | 18 to 22 months | ASQ2<br>Delay: 2SD<br>Domain: Any             | BSID (2 <sup>nd</sup> Edition)<br>Delay: 2SD<br>Domain: Any                                                                                                             |
| <b>Yu_2007<sup>69</sup></b><br><b>United Kingdom</b> | 828 | Prospective | Information not available                                                                                                                                                                                                 | Children who born to mothers treated with MgSO4 for the treatment of preeclampsia      | 12 – 60 months  | ASQ2<br>Delay: 2SD<br>Domain: Any             | BSID (2 <sup>nd</sup> Edition) or DDST (2 <sup>nd</sup> Edition) or GMDS or Neurosensory disability<br>Delay: 2SD; or severe neurosensory disability<br><br>Domain: Any |
| <b>Yue_2019A<sup>70</sup></b><br><b>China</b>        | 630 | Prospective | 111 project Yaojiang Shi, the National Natural Science Foundation of China, the International Initiative for Impact Evaluation, UBS Optimus Foundation and the Fundamental                                                | Children from Qinba (rural) region of China                                            | 13-18 months    | ASQ3<br>Delay: 2SD<br>Domain: Problem-solving | Bayley-III<br>Delay: 2SD<br>Domain: Cognitive                                                                                                                           |

|                                               |     |             |                                                                                                                                                                                                                         |                                             |              |                                                       |                                                             |
|-----------------------------------------------|-----|-------------|-------------------------------------------------------------------------------------------------------------------------------------------------------------------------------------------------------------------------|---------------------------------------------|--------------|-------------------------------------------------------|-------------------------------------------------------------|
|                                               |     |             | Research Funds for the Central Universities                                                                                                                                                                             |                                             |              |                                                       |                                                             |
| <b>Yue_2019B<sup>70</sup></b><br><b>China</b> | 630 | Prospective | 111 project Yaojiang Shi, the National Natural Science Foundation of China, the International Initiative for Impact Evaluation, UBS Optimus Foundation and the Fundamental Research Funds for the Central Universities  | Children from Qinba (rural) region of China | 13-18 months | ASQ3<br>Delay: 2SD<br>Domain: Communication           | Bayley-III<br>Delay: 2SD<br>Domain: Speech and language     |
| <b>Yue_2019C<sup>70</sup></b><br><b>China</b> | 630 | Prospective | 111 project Yaojiang Shi), the National Natural Science Foundation of China, the International Initiative for Impact Evaluation, UBS Optimus Foundation and the Fundamental Research Funds for the Central Universities | Children from Qinba (rural) region of China | 13-18 months | ASQ3<br>Delay: 2SD<br>Domain: Fine motor, gross motor | Bayley-III<br>Delay: 2SD<br>Domain: Fine motor, gross motor |
| <b>Yue_2019D<sup>70</sup></b><br><b>China</b> | 493 | Prospective | 111 project Yaojiang Shi, the National Natural Science Foundation of China, the International Initiative for Impact Evaluation, UBS Optimus Foundation and the Fundamental Research Funds for the Central Universities  | Children from Qinba (rural) region of China | 19-24 months | ASQ3<br>Delay: 2SD<br>Domain: Problem solving         | Bayley-III<br>Delay: 2SD<br>Domain: Cognitive               |

|                                               |     |             |                                                                                                                                                                                                                        |                                             |              |                                                       |                                                             |
|-----------------------------------------------|-----|-------------|------------------------------------------------------------------------------------------------------------------------------------------------------------------------------------------------------------------------|---------------------------------------------|--------------|-------------------------------------------------------|-------------------------------------------------------------|
| <b>Yue_2019E<sup>70</sup></b><br><b>China</b> | 493 | Prospective | 111 project Yaojiang Shi, the National Natural Science Foundation of China, the International Initiative for Impact Evaluation, UBS Optimus Foundation and the Fundamental Research Funds for the Central Universities | Children from Qinba (rural) region of China | 19-24 months | ASQ3<br>Delay: 2SD<br>Domain: Communication           | Bayley-III<br>Delay: 2SD<br>Domain: Speech and language     |
| <b>Yue_2019F<sup>70</sup></b><br><b>China</b> | 493 | Prospective | 111 project Yaojiang Shi, the National Natural Science Foundation of China, the International Initiative for Impact Evaluation, UBS Optimus Foundation and the Fundamental Research Funds for the Central Universities | Children from Qinba (rural) region of China | 19-24 months | ASQ3<br>Delay: 2SD<br>Domain: Fine motor, gross motor | Bayley-III<br>Delay: 2SD<br>Domain: Fine motor, gross motor |

# Included in the systematic review, but not meta-analysis

ADSI – Ankara Development Screening Inventory; AIMS – Alberta Infant Motor Scale; ASQ – Ages and Stages Questionnaire; ASQ-TRAK – ASQ version that is culturally and linguistically adapted ASQ-3 for Australian Aboriginal children; BDI – Batelle Development Index; BSID – Bayley Scale of Infant Development; DASII – Developmental Assessment Scale for Indian Infants; DDST – Denver Developmental Screening Test; GADNE – Gesell and Armatruda Developmental and Neurologic Examination; GCI – General Cognitive Intelligence; GECDAS – Gazi Early Childhood Development Assessment Scale; GMDS – Griffiths Mental Development Scales; GQ – General Quotient (Griffiths Mental Development Scales); KSPD – Kyoto Scale of Psychological Development; MABC – Movement Assessment Battery for Children; MDI – Mental Development Index (Bayley Scale of Infant Development); MSCA – McCarthy Scales of Children’s Ability; NSMDA - Neurological, sensory, motor, developmental assessment; PDI – Psychomotor Development Index (Bayley Scale of Infant Development); PDMS - Peabody Developmental Motor Scales; PLS – Preschool Language Scales; PRELS – Preschool Receptive-Expressive Language Scale); PRUNAPE – Prueba Nacional de Pesquisa (National Screening Test of Latin America); SBIT – Stanford-Binet Intelligence Test ; SELSI – Sequenced Language Scale for Infants; VABS – Vineland Adaptive Behavior Scales; VLBW – Very low birth weight; WPPSI – Wechsler Preschool and Primary Scale of Intelligence; WPPSI-R – Wechsler Preschool and Primary Scale of Intelligence (revised edition).

eTable2. Characteristics of the included studies that used “&gt;1SD below the mean” cut-off for ASQ

| Study ID                                             | Sample size | Study Design | Funding                                                                                     | Study Population                                                                   | Age at Assessment (months) | Index Test                                  | Reference Standard Test                                                    |
|------------------------------------------------------|-------------|--------------|---------------------------------------------------------------------------------------------|------------------------------------------------------------------------------------|----------------------------|---------------------------------------------|----------------------------------------------------------------------------|
| <b>Fauls_2020B<sup>38</sup></b><br><b>Australia</b>  | 74          | Prospective  | Funding Information not available. Authors declared that there was no conflict of interest. | Children aged 0 to 5 years attending a specialist clinic                           | 27.3 (18.4) months         | ASQ3<br>Delay:1SD<br>Domain: Gross motor    | NSMDA>9 (minimal)<br>Delay: 1SD; Total score>9<br>Domain: Gross motor      |
| <b>Hwarng_2021A<sup>21</sup></b><br><b>Singapore</b> | 127         | Prospective  | AM-ETHOS Duke Medical Student Fellowship Award                                              | <32 weeks and/or <1250 grams followed up at the Neonatal Neurodevelopmental Clinic | 12 months                  | ASQ 3<br>Delay:1SD<br>Domain: Gross motor   | PDMS (2 <sup>nd</sup> Edition)<br>Delay: 1SD<br>Domain: Gross motor        |
| <b>Hwarng_2021B<sup>21</sup></b><br><b>Singapore</b> | 127         | Prospective  | AM-ETHOS Duke Medical Student Fellowship Award                                              | <32 weeks and/or <1250 grams followed up at the Neonatal Neurodevelopmental Clinic | 12 months                  | ASQ 3<br>Delay:1SD<br>Domain: Fine motor    | PDMS (2 <sup>nd</sup> Edition)<br>Delay: 1SD<br>Domain: Fine motor         |
| <b>Hwarng_2021C<sup>21</sup></b><br><b>Singapore</b> | 113         | Prospective  | AM-ETHOS Duke Medical Student Fellowship Award                                              | <32 weeks and/or <1250 grams followed up at the Neonatal Neurodevelopmental Clinic | 18 months                  | ASQ 3<br>Delay:1SD<br>Domain: Communication | PLS (4 <sup>th</sup> edition)<br>Delay: 1SD<br>Domain: Speech and language |

|                                                         |     |               |                                                                                                                                                                                                                     |                                                                                      |                 |                                                      |                                                                                 |
|---------------------------------------------------------|-----|---------------|---------------------------------------------------------------------------------------------------------------------------------------------------------------------------------------------------------------------|--------------------------------------------------------------------------------------|-----------------|------------------------------------------------------|---------------------------------------------------------------------------------|
| <b>Kim_2010A<sup>49</sup></b><br><b>Korea</b>           | 138 | Retrospective | Information not available                                                                                                                                                                                           | Preterm infants < 32 weeks or less than 1,500 grams. Infants with HIE were excluded. | 18 months       | ASQ2<br>Delay:1SD<br>Domain: Any                     | Bayley-III<br>Delay: 1SD<br>Domain: Any                                         |
| <b>Kim_2010B<sup>49</sup></b><br><b>Korea</b>           | 138 | Retrospective | Information not available                                                                                                                                                                                           | Preterm infants < 32 weeks or less than 1,500 grams. Infants with HIE were excluded. | 18 months       | ASQ2<br>Delay:1SD<br>Domain: Any                     | Bayley-III<br>Delay: 2SD<br>Domain: Any                                         |
| <b>King-Dowling_2015B<sup>50</sup></b><br><b>Canada</b> | 159 | Prospective   | Ontario's Ministry of Child and Youth Services                                                                                                                                                                      | Children with no known physical impairments with IQ $\geq 70$                        | 43 to 66 months | ASQ3<br>Delay:1SD<br>Domain: Fine motor, gross motor | MABC (2 <sup>nd</sup> Edition)<br>Delay: 1SD<br>Domain: Fine motor, gross motor |
| <b>Lepine_2021C<sup>53</sup></b><br><b>Canada</b>       | 63  | Prospective   | Scholarship awarded to Mr Lépine by the Programme d'Excellence en Médecine pour l'Initiation En Recherche of the Faculty of medicine of the Université de Montréal and by the Heart and Stroke Foundation of Canada | Term infants who underwent surgical repair within first year of life.                | 12 months       | ASQ3<br>Delay:1SD<br>Domain: Any                     | Bayley-III<br>Delay: 1SD<br>Domain: Any                                         |
| <b>Lepine_2021D<sup>53</sup></b><br><b>Canada</b>       | 81  | Prospective   | Scholarship awarded to Mr Lépine by the Programme d'Excellence en Médecine pour                                                                                                                                     | Term infants who underwent surgical repair within first year of life.                | 24 months       | ASQ3<br>Delay:1SD<br>Domain: Any                     | Bayley-III<br>Delay: 1SD<br>Domain: Any                                         |

|                                                       |     |             |                                                                                                                                     |                                                                                 |              |                                                 |                                                                              |
|-------------------------------------------------------|-----|-------------|-------------------------------------------------------------------------------------------------------------------------------------|---------------------------------------------------------------------------------|--------------|-------------------------------------------------|------------------------------------------------------------------------------|
|                                                       |     |             | l'Initiation En Recherche of the Faculty of medicine of the Université de Montréal and by the Heart and Stroke Foundation of Canada |                                                                                 |              |                                                 |                                                                              |
| <b>Lindsay_2008C<sup>55</sup></b><br><b>Australia</b> | 32  | Prospective | National Health and Medical Research Council of Australia                                                                           | Infants ≥34 weeks GA at birth with perinatal asphyxia                           | 12 months    | ASQ<br>Delay:1SD<br>Domain: Any                 | BSID (2 <sup>nd</sup> Edition)<br>Delay: 1SD<br>Domain: Any (either MDI/PDI) |
| <b>Noeder_2017E<sup>57</sup></b><br><b>USA</b>        | 239 | Prospective | Institutional Development Award (IDeA) from the National Institute of General Medical Sciences of the National Institutes of Health | Children with congenital heart disease underwent cardiac surgery during infancy | 6 -36 months | ASQ3<br>Delay:1SD<br>Domain:<br>Problem solving | Bayley-III<br>Delay: 1SD<br>Domain: Cognitive                                |
| <b>Noeder_2017F<sup>57</sup></b><br><b>USA</b>        | 228 | Prospective | Institutional Development Award (IDeA) from the National Institute of General Medical Sciences of the National Institutes of Health | Children with congenital heart disease underwent cardiac surgery during infancy | 6 -36 months | ASQ3<br>Delay:1SD<br>Domain:<br>Communication   | Bayley-III<br>Delay: 1SD<br>Domain: speech and language                      |
| <b>Noeder_2017G<sup>57</sup></b><br><b>USA</b>        | 242 | Prospective | Institutional Development Award (IDeA) from the National Institute of General Medical Sciences of the                               | Children with congenital heart disease underwent cardiac surgery during infancy | 6 -36 months | ASQ3<br>Delay:1SD<br>Domain: Fine motor         | Bayley-III<br>Delay: 1SD<br>Domain: Fine motor                               |



|                                                   |     |             |                                                                                                                                     |                                                                                 |              |                                                                              |                                                                                                                 |
|---------------------------------------------------|-----|-------------|-------------------------------------------------------------------------------------------------------------------------------------|---------------------------------------------------------------------------------|--------------|------------------------------------------------------------------------------|-----------------------------------------------------------------------------------------------------------------|
|                                                   |     |             | National Institutes of Health                                                                                                       |                                                                                 |              |                                                                              |                                                                                                                 |
| <b>Noeder_2017H<sup>57</sup></b><br><b>USA</b>    | 244 | Prospective | Institutional Development Award (IDeA) from the National Institute of General Medical Sciences of the National Institutes of Health | Children with congenital heart disease underwent cardiac surgery during infancy | 6 -36 months | ASQ3<br>Delay:1SD<br>Domain: Gross motor                                     | Bayley-III<br>Delay: 1SD<br>Domain: Gross motor                                                                 |
| <b>Simard_2012E<sup>62</sup></b><br><b>Canada</b> | 121 | Prospective | Canadian Institutes of Health Research                                                                                              | Infants born between 29 and 36 6/7 weeks of gestation at birth, BW <2.5Kg       | 12 months    | ASQ2<br>Delay:1SD<br>Domain: Problem solving, communication, personal-social | BSID (2 <sup>nd</sup> Edition)<br>Delay: 1SD; MDI<85<br>Domain: Cognitive, speech and language, personal-social |
| <b>Simard_2012F<sup>62</sup></b><br><b>Canada</b> | 119 | Prospective | Canadian Institutes of Health Research                                                                                              | Infants born between 29 and 36 6/7 weeks of gestation at birth, BW <2.5Kg       | 12 months    | ASQ2<br>Delay:1SD<br>Domain: Fine motor, gross motors                        | BSID (2 <sup>nd</sup> Edition)<br>Delay: 1SD; PDI<85<br>Domain: Fine motor, gross motors                        |
| <b>Simard_2012G<sup>62</sup></b><br><b>Canada</b> | 109 | Prospective | Canadian Institutes of Health Research                                                                                              | Infants born between 29 and 36 6/7 weeks of gestation at birth, BW <2.5Kg       | 24 months    | ASQ2<br>Delay:1SD<br>Domain: Problem solving, communication, personal social | BSID (2 <sup>nd</sup> Edition)<br>Delay: 1SD; MDI<85<br>Domain: Cognitive, speech and language, personal-social |

|                                                         |     |             |                                                                                                                                                                                                                           |                                                                                                 |              |                                                      |                                                                                         |
|---------------------------------------------------------|-----|-------------|---------------------------------------------------------------------------------------------------------------------------------------------------------------------------------------------------------------------------|-------------------------------------------------------------------------------------------------|--------------|------------------------------------------------------|-----------------------------------------------------------------------------------------|
| <b>Simard_2012H<sup>62</sup></b><br><b>Canada</b>       | 107 | Prospective | Canadian Institutes of Health Research                                                                                                                                                                                    | Infants born between 29 and 36 6/7 weeks of gestation at birth, BW <2.5Kg                       | 24 months    | ASQ2<br>Delay:1SD<br>Domain: Fine motor, gross motor | BSID (2 <sup>nd</sup> Edition)<br>Delay: 1SD; PDI<85<br>Domain: Fine motor, gross motor |
| <b>Steenis_2015C<sup>65</sup></b><br><b>Netherlands</b> | 565 | Prospective | ZonMW                                                                                                                                                                                                                     | Healthy and at-risk children 18 to 42 months                                                    | 18-42 months | ASQ3<br>Delay:1SD<br>Domain: Any                     | Bayley-III<br>Delay: 1SD<br>Domain: Any                                                 |
| <b>Steenis_2015D<sup>65</sup></b><br><b>Netherlands</b> | 565 | Prospective | ZonMW                                                                                                                                                                                                                     | Healthy and at-risk children 18 to 42 months                                                    | 18-42 months | ASQ3<br>Delay:1SD<br>Domain: Any                     | Bayley-III<br>Delay: 2SD<br>Domain: Any                                                 |
| <b>Woodward_2011C<sup>68</sup></b>                      | 169 | Prospective | National Institute of Child Health and Human Development and grants from the General Clinical Research Centers Programs at the University of New Mexico, Tufts-New England Medical Center, and the University of Colorado | Birthweight between 500-999 grams and the need for mechanical ventilation at 12-48 hours of age | 18-22 months | ASQ2<br>Delay:1SD<br>Domain: Any                     | BSID (2 <sup>nd</sup> Edition)<br>Delay: 2SD<br>Domain: Any                             |
| <b>Yue_2019G<sup>70</sup></b><br><b>China</b>           | 630 | Prospective | 111 project Yaojiang Shi, the National Natural Science Foundation of China, the International Initiative for Impact Evaluation, UBS Optimus Foundation                                                                    | Children from Qinba (rural) region of China                                                     | 13-18 months | ASQ3<br>Delay:1SD<br>Domain: Problem solving         | Bayley-III<br>Delay: 1SD<br>Domain: Cognitive                                           |

|                                               |     |             |                                                                                                                                                                                                                        |                                             |              |                                                      |                                                             |
|-----------------------------------------------|-----|-------------|------------------------------------------------------------------------------------------------------------------------------------------------------------------------------------------------------------------------|---------------------------------------------|--------------|------------------------------------------------------|-------------------------------------------------------------|
|                                               |     |             | and the Fundamental Research Funds for the Central Universities                                                                                                                                                        |                                             |              |                                                      |                                                             |
| <b>Yue_2019H<sup>70</sup></b><br><b>China</b> | 630 | Prospective | 111 project Yaojiang Shi, the National Natural Science Foundation of China, the International Initiative for Impact Evaluation, UBS Optimus Foundation and the Fundamental Research Funds for the Central Universities | Children from Qinba (rural) region of China | 13-18 months | ASQ3<br>Delay:1SD<br>Domain: Communication           | Bayley-III<br>Delay: 1SD<br>Domain: speech and language     |
| <b>Yue_2019I<sup>70</sup></b><br><b>China</b> | 630 | Prospective | 111 project Yaojiang Shi, the National Natural Science Foundation of China, the International Initiative for Impact Evaluation, UBS Optimus Foundation and the Fundamental Research Funds for the Central Universities | Children from Qinba (rural) region of China | 13-18 months | ASQ3<br>Delay:1SD<br>Domain: Fine motor, gross motor | Bayley-III<br>Delay: 1SD<br>Domain: Fine motor, gross motor |
| <b>Yue_2019J<sup>70</sup></b><br><b>China</b> | 493 | Prospective | 111 project Yaojiang Shi, the National Natural Science Foundation of China, the International Initiative for Impact Evaluation, UBS Optimus Foundation                                                                 | Children from Qinba (rural) region of China | 19-24 months | ASQ3<br>Delay:1SD<br>Domain: Problem solving         | Bayley-III<br>Delay: 1SD<br>Domain: Cognitive               |

|                                               |     |             |                                                                                                                                                                                                                        |                                             |              |                                                      |                                                                |
|-----------------------------------------------|-----|-------------|------------------------------------------------------------------------------------------------------------------------------------------------------------------------------------------------------------------------|---------------------------------------------|--------------|------------------------------------------------------|----------------------------------------------------------------|
|                                               |     |             | and the Fundamental Research Funds for the Central Universities                                                                                                                                                        |                                             |              |                                                      |                                                                |
| <b>Yue_2019K<sup>70</sup></b><br><b>China</b> | 493 | Prospective | 111 project Yaojiang Sh), the National Natural Science Foundation of China, the International Initiative for Impact Evaluation, UBS Optimus Foundation and the Fundamental Research Funds for the Central Universities | Children from Qinba (rural) region of China | 19-24 months | ASQ3<br>Delay:1SD<br>Domain: Communication           | Bayley-III<br>Delay: 1SD<br>Domain: Speech and language domain |
| <b>Yue_2019L<sup>70</sup></b><br><b>China</b> | 493 | Prospective | 111 project Yaojiang Shi, the National Natural Science Foundation of China, the International Initiative for Impact Evaluation, UBS Optimus Foundation and the Fundamental Research Funds for the Central Universities | Children from Qinba (rural) region of China | 19-24 months | ASQ3<br>Delay:1SD<br>Domain: Fine motor, gross motor | Bayley-III<br>Delay: 1SD<br>Domain: Fine motor, gross motor    |

# Included in the systematic review, but not meta-analysis

ADSI – Ankara Development Screening Inventory; AIMS – Alberta Infant Motor Scale; ASQ – Ages and Stages Questionnaire; ASQ-TRAK – ASQ version that is culturally and linguistically adapted ASQ-3 for Australian Aboriginal children; BDI – Batelle Development Index; BSID – Bayley Scale of Infant Development; DASII – Developmental Assessment Scale for Indian Infants; DDST – Denver Developmental Screening Test; GADNE – Gesell and Armatruda Developmental and Neurologic Examination; GCI – General Cognitive Intelligence; GECDAS – Gazi Early Childhood Development Assessment Scale; GMDS – Griffiths Mental Development Scales; GQ – General Quotient (Griffiths Mental Development Scales); KSPD – Kyoto Scale of Psychological Development;

MABC – Movement Assessment Battery for Children; MDI – Mental Development Index (Bayley Scale of Infant Development); MSCA – McCarthy Scales of Children’s Ability; NSMDA - Neurological, sensory, motor, developmental assessment; PDI – Psychomotor Development Index (Bayley Scale of Infant Development); PDMS - Peabody Developmental Motor Scales; PLS – Preschool Language Scales; PRELS – Preschool Receptive-Expressive Language Scale); PRUNAPE – Prueba Nacional de Pesquisa (National Screening Test of Latin America); SBIT – Stanford-Binet Intelligence Test ; SELSI – Sequenced Language Scale for Infants; VABS – Vineland Adaptive Behavior Scales; VLBW – Very low birth weight; WPPSI – Wechsler Preschool and Primary Scale of Intelligence; WPPSI-R – Wechsler Preschool and Primary Scale of Intelligence (revised edition).

**eFigure2: Risk of Bias of included studies-summary graph**

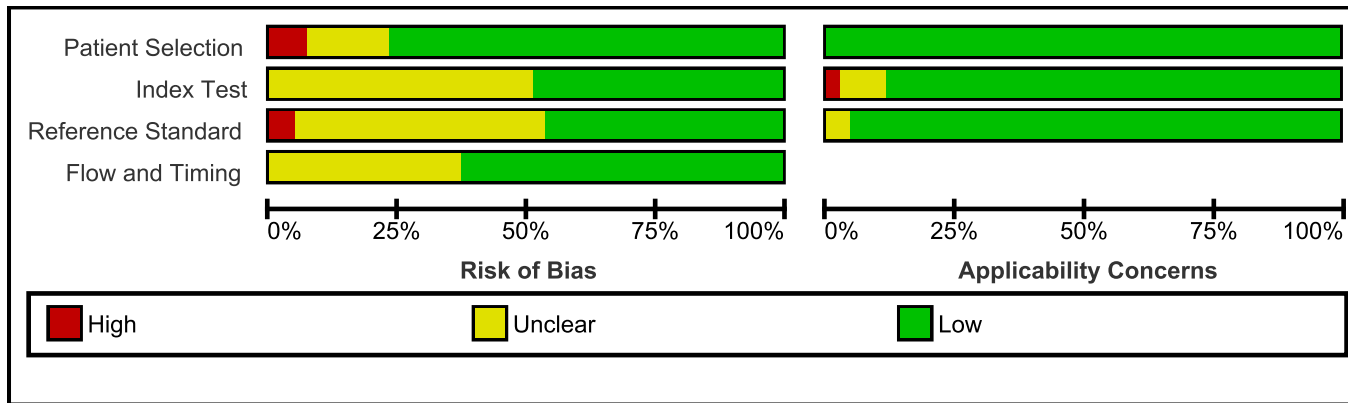

**eFigure3: Methodological Quality of included studies**

|                          | Risk of Bias      |            |                    |                 | Applicability Concerns |            |                    |
|--------------------------|-------------------|------------|--------------------|-----------------|------------------------|------------|--------------------|
|                          | Patient Selection | Index Test | Reference Standard | Flow and Timing | Patient Selection      | Index Test | Reference Standard |
| Agarwal_2016 (34)        | ●                 | ?          | ●                  | ?               | ●                      | ●          | ●                  |
| Bian_2012 (35)           | ●                 | ?          | ●                  | ?               | ●                      | ●          | ●                  |
| Carmichael_2014 (36)     | ●                 | ?          | ?                  | ●               | ●                      | ●          | ●                  |
| Colbert_2021(37)         | ●                 | ?          | ?                  | ●               | ●                      | ●          | ●                  |
| Fauls_2020 (38)          | ?                 | ?          | ●                  | ●               | ●                      | ●          | ●                  |
| Flamant_2011 (4)         | ●                 | ●          | ?                  | ●               | ●                      | ●          | ●                  |
| Fuengfoo_2020 (39)       | ●                 | ?          | ?                  | ●               | ●                      | ●          | ●                  |
| Ga_2011 (40)             | ●                 | ?          | ?                  | ●               | ●                      | ●          | ●                  |
| Gollenberg_2009 (41)     | ●                 | ?          | ?                  | ?               | ●                      | ●          | ●                  |
| Gutierrez-Cruz_2019 (42) | ●                 | ?          | ?                  | ●               | ●                      | ?          | ?                  |
| Halbwachs_2013 (43)      | ●                 | ?          | ●                  | ●               | ?                      | ?          | ●                  |
| Hwang_2021 (21)          | ●                 | ?          | ?                  | ?               | ●                      | ●          | ●                  |
| Jang_2019 (44)           | ?                 | ?          | ?                  | ?               | ●                      | ●          | ●                  |
| Juneja_2011 (45)         | ●                 | ●          | ●                  | ●               | ●                      | ●          | ●                  |
| Kapci_2010 (46)          | ●                 | ●          | ?                  | ●               | ●                      | ●          | ●                  |
| Kerstjens_2015 (47)      | ?                 | ●          | ●                  | ●               | ●                      | ●          | ●                  |
| Kim_2010 (49)            | ●                 | ?          | ?                  | ?               | ●                      | ●          | ?                  |
| Kim_2016 (48)            | ●                 | ?          | ?                  | ?               | ●                      | ●          | ●                  |
| King-Dowling_2015 (50)   | ●                 | ●          | ●                  | ●               | ●                      | ●          | ●                  |
| Klamer_2005 (51)         | ?                 | ?          | ?                  | ?               | ●                      | ●          | ●                  |
| Kwun_2015 (52)           | ●                 | ?          | ?                  | ?               | ●                      | ●          | ●                  |
| Lepine_2021 (53)         | ●                 | ●          | ●                  | ?               | ●                      | ●          | ●                  |
| Limbos_2011 (54)         | ●                 | ●          | ●                  | ●               | ●                      | ●          | ●                  |
| Lindsay_2008 (55)        | ●                 | ●          | ●                  | ?               | ●                      | ●          | ●                  |
| Mackin_2017 (56)         | ?                 | ●          | ●                  | ?               | ●                      | ●          | ●                  |
| Mezawa_2019 (20)         | ●                 | ●          | ●                  | ●               | ●                      | ●          | ●                  |
| Noeder_2017 (57)         | ●                 | ●          | ●                  | ?               | ●                      | ●          | ●                  |
| O' Connor_2020 (58)      | ●                 | ?          | ●                  | ●               | ●                      | ●          | ●                  |
| Otalvaro_2018 (59)       | ?                 | ?          | ●                  | ?               | ●                      | ●          | ●                  |
| Schonaut_2013 (60)       | ●                 | ●          | ●                  | ●               | ●                      | ●          | ●                  |
| Sheldrick_2020 (61)      | ●                 | ●          | ●                  | ?               | ●                      | ●          | ●                  |
| Simard_2012 (62)         | ●                 | ●          | ●                  | ●               | ●                      | ●          | ●                  |
| Simpson_2021 (19)        | ●                 | ●          | ●                  | ●               | ●                      | ●          | ●                  |
| Skellern_2001 (63)       | ●                 | ●          | ●                  | ?               | ●                      | ●          | ●                  |
| Smith_2012 (64)          | ●                 | ●          | ?                  | ?               | ●                      | ●          | ●                  |
| Squires_1997 (3)         | ●                 | ?          | ?                  | ●               | ●                      | ?          | ●                  |
| Srinithiwat_2014 (71)    | ?                 | ?          | ?                  | ●               | ●                      | ●          | ●                  |
| Steenis_2015 (65)        | ●                 | ●          | ●                  | ●               | ●                      | ●          | ●                  |
| Vanvuchelen_2017 (66)    | ●                 | ?          | ?                  | ?               | ●                      | ●          | ●                  |
| Veldhuizen_2015 (67)     | ●                 | ●          | ●                  | ●               | ●                      | ●          | ●                  |
| Woodward_2011 (68)       | ●                 | ●          | ?                  | ●               | ●                      | ●          | ●                  |
| Yu_2007 (69)             | ●                 | ?          | ?                  | ?               | ●                      | ?          | ●                  |
| Yue_2019 (70)            | ●                 | ?          | ?                  | ●               | ●                      | ●          | ●                  |

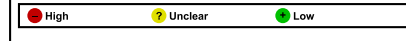



eFigure 4: SROC for ASQ-2SD to predict “any delay”

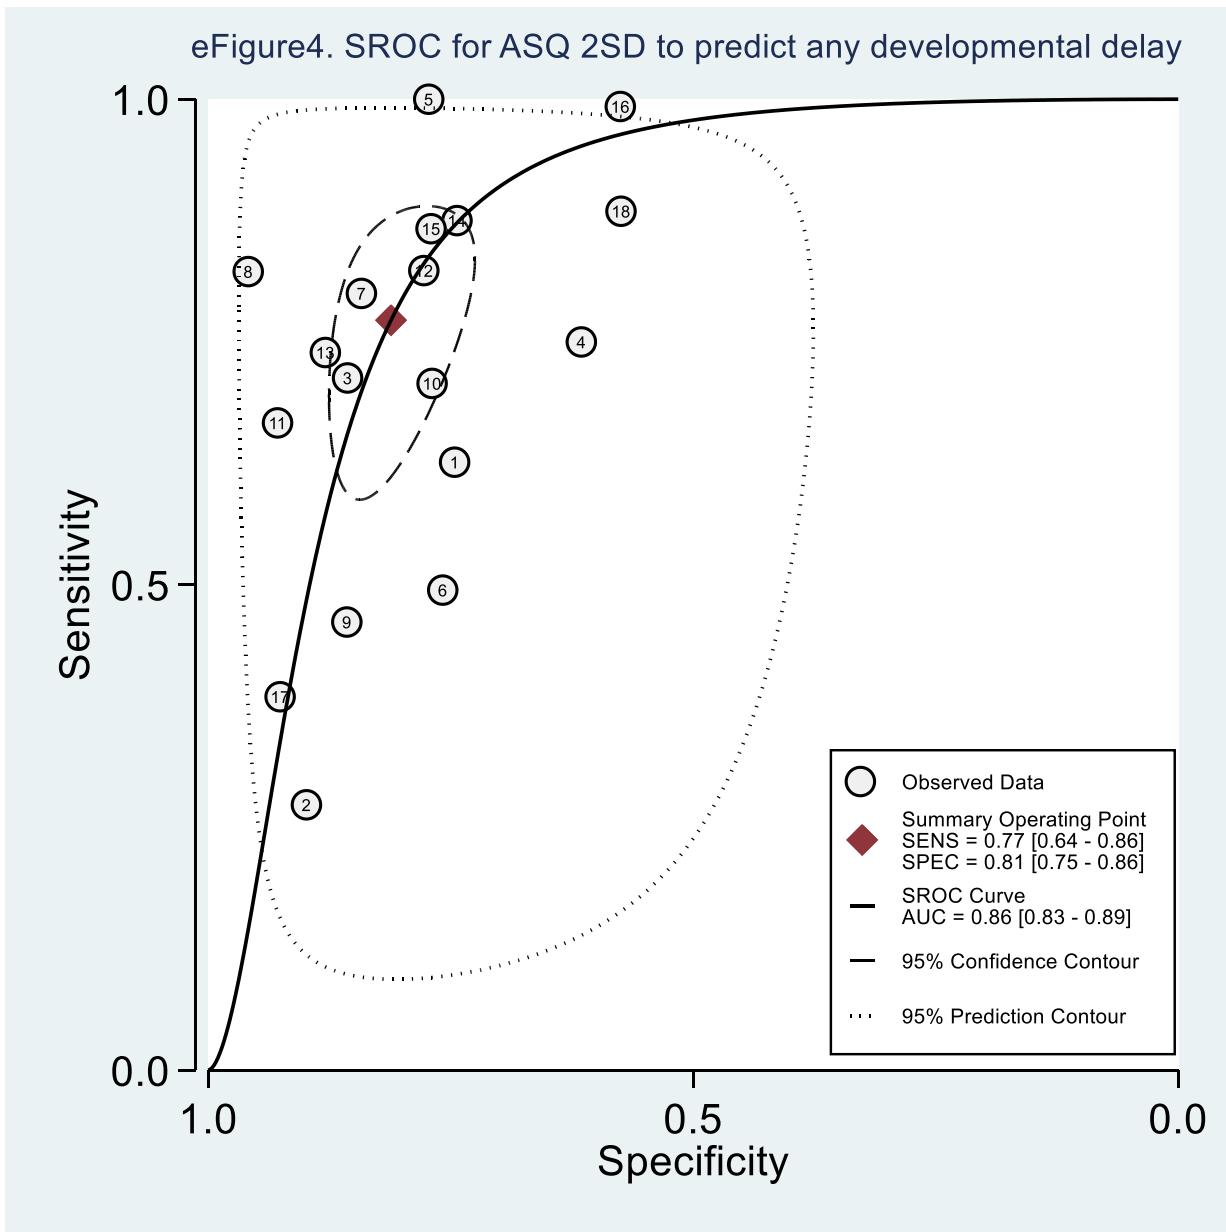

**eFigure5: Diagnostic Odds Ratio of ASQ-2SD to predict “any delay”**

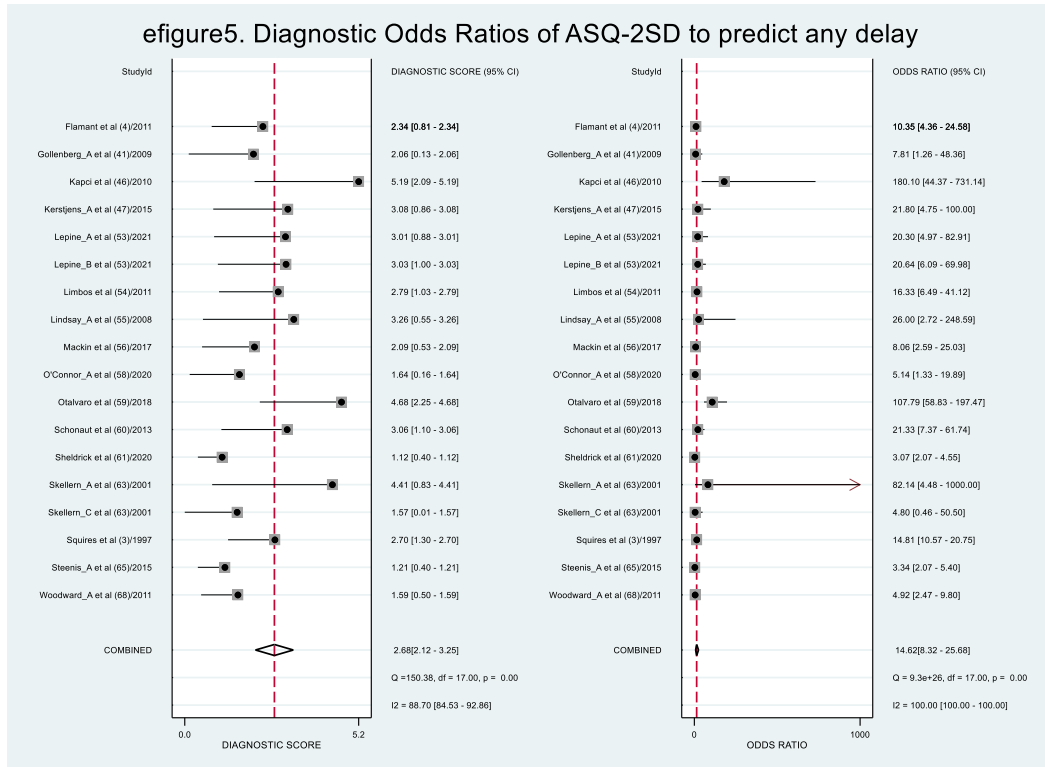

**eFigure6: Funnel plot for publication bias (ASQ-2SD to predict “any delay”)**

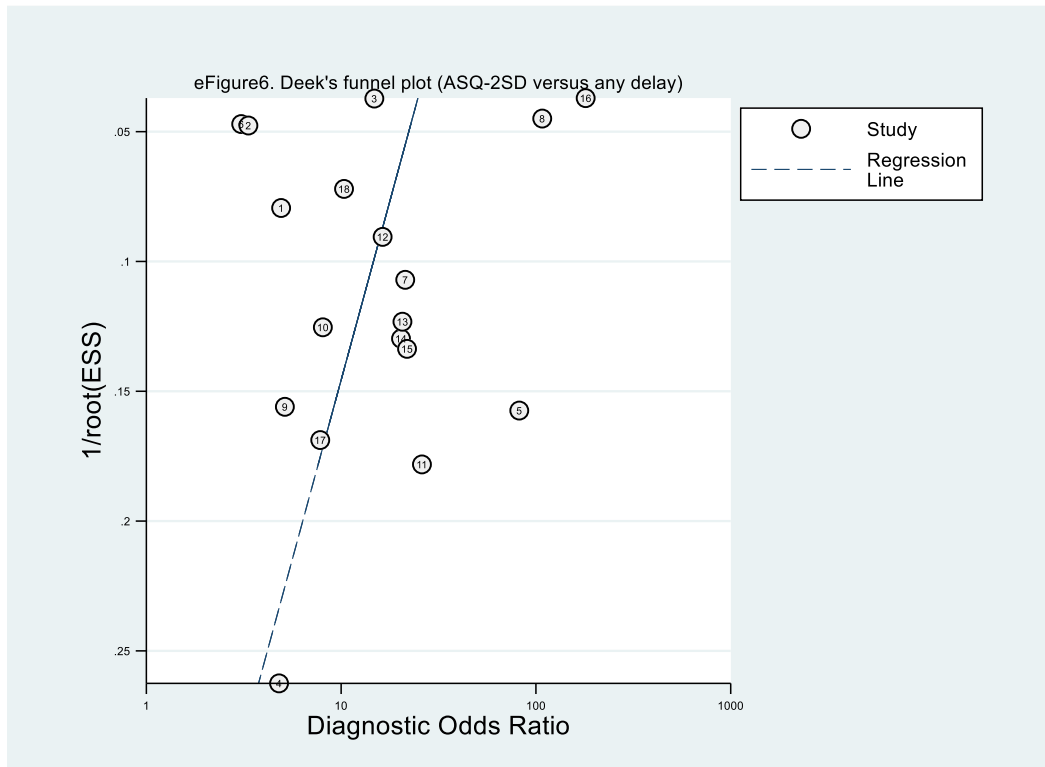

**eFigure 7: Fagan nomogram if baseline prevalence is of “any delay” is 5% (ASQ-2SD to predict “any delay”)**

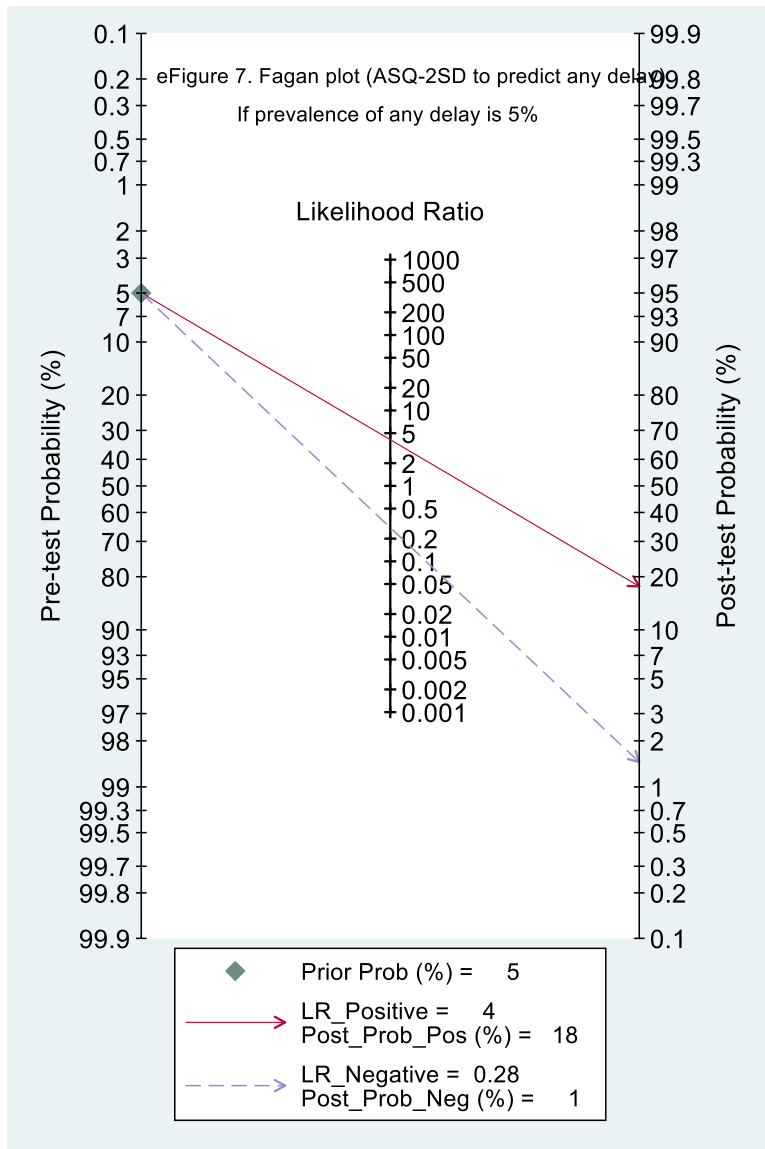

**eTable3: Post-test probabilities for various pre-test prevalence of “any delay” based on the results of ASQ-2SD**

| Pre-test probability of “any delay” | Post-test probability of “any delay” if the child <b>fails</b> on ASQ-2SD | Post-test probability of “any delay” if the child <b>passes</b> on ASQ-2SD |
|-------------------------------------|---------------------------------------------------------------------------|----------------------------------------------------------------------------|
| 5%                                  | 18%                                                                       | 1%                                                                         |
| 10%                                 | 31%                                                                       | 3%                                                                         |
| 15%                                 | 42%                                                                       | 5%                                                                         |
| 20%                                 | 51%                                                                       | 7%                                                                         |

eFigure8: SROC of ASQ-2SD to predict “severe delay”

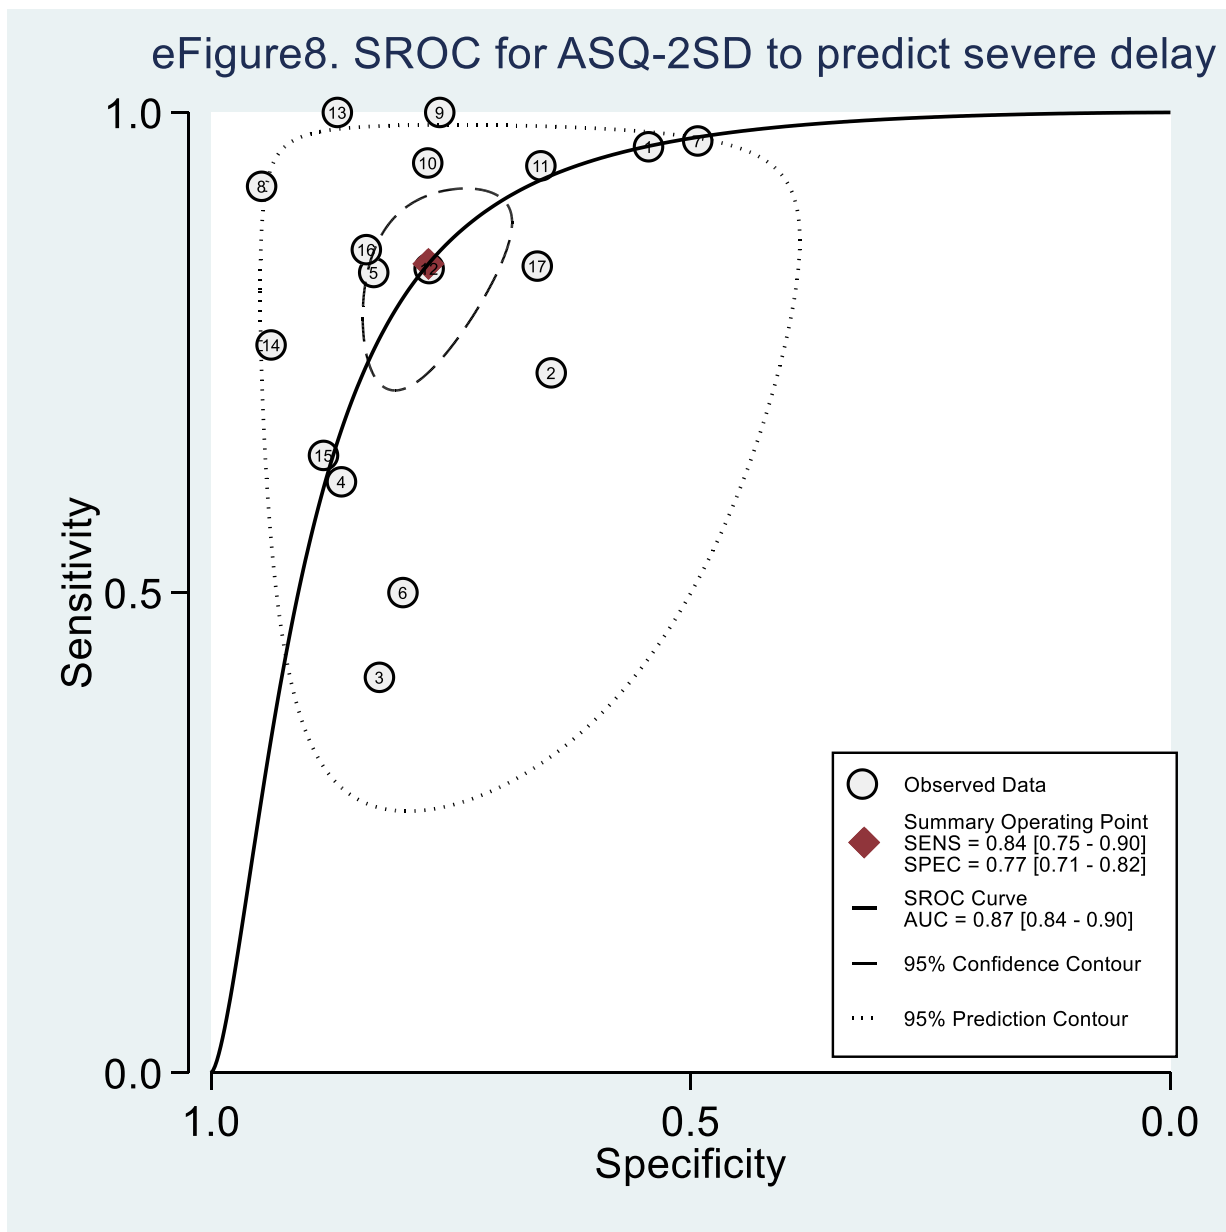

**eFigure9: Diagnostic Odds Ratio of ASQ-2SD to predict “severe delay”**

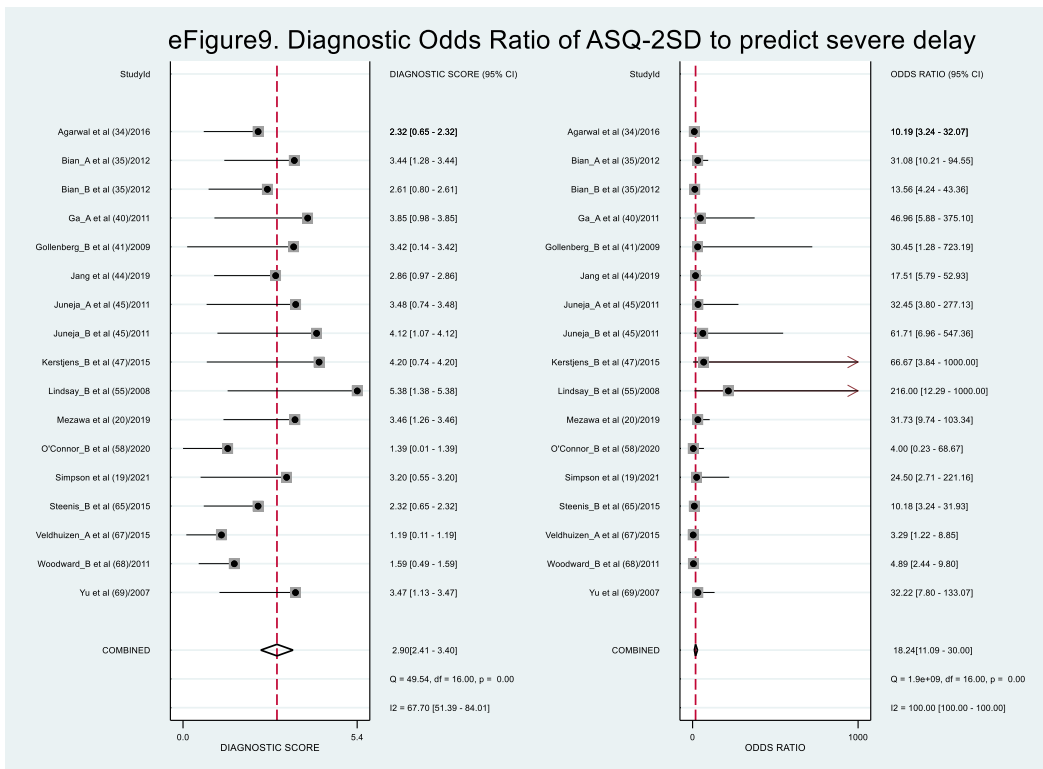

**eFigure10: Funnel plot for publication bias (ASQ-2SD to predict “severe delay”)**

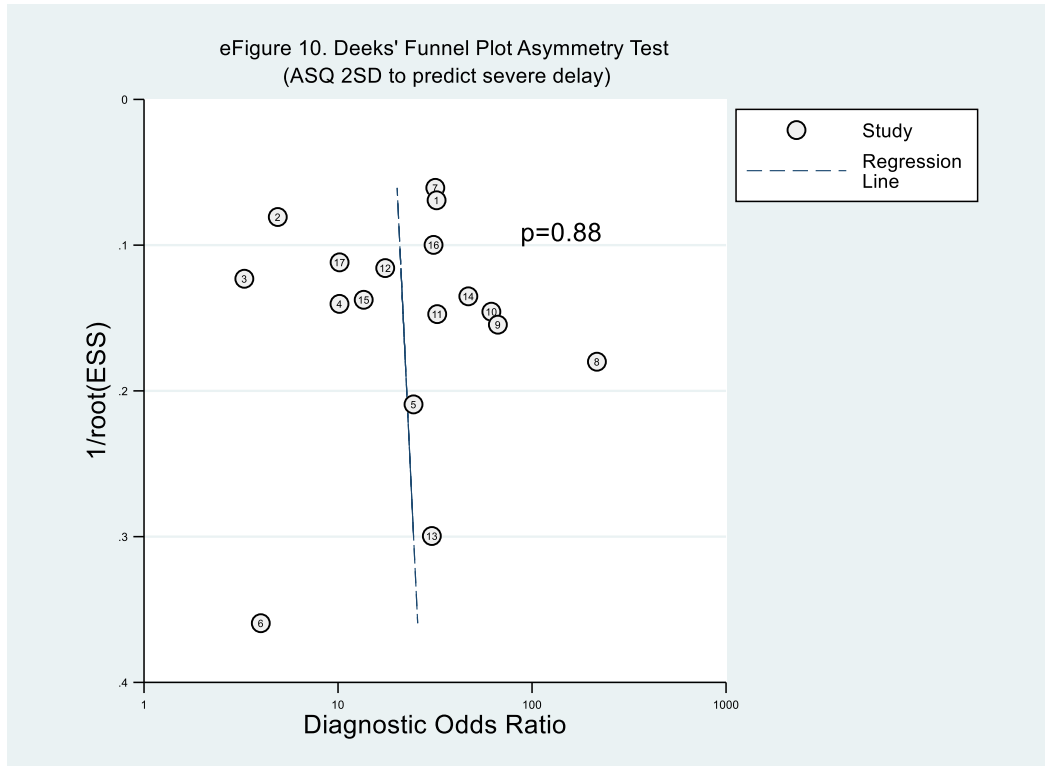

**eFigure11: Fagan nomogram if baseline prevalence of “severe delay” is 5% (ASQ-2SD to predict “severe delay”)**



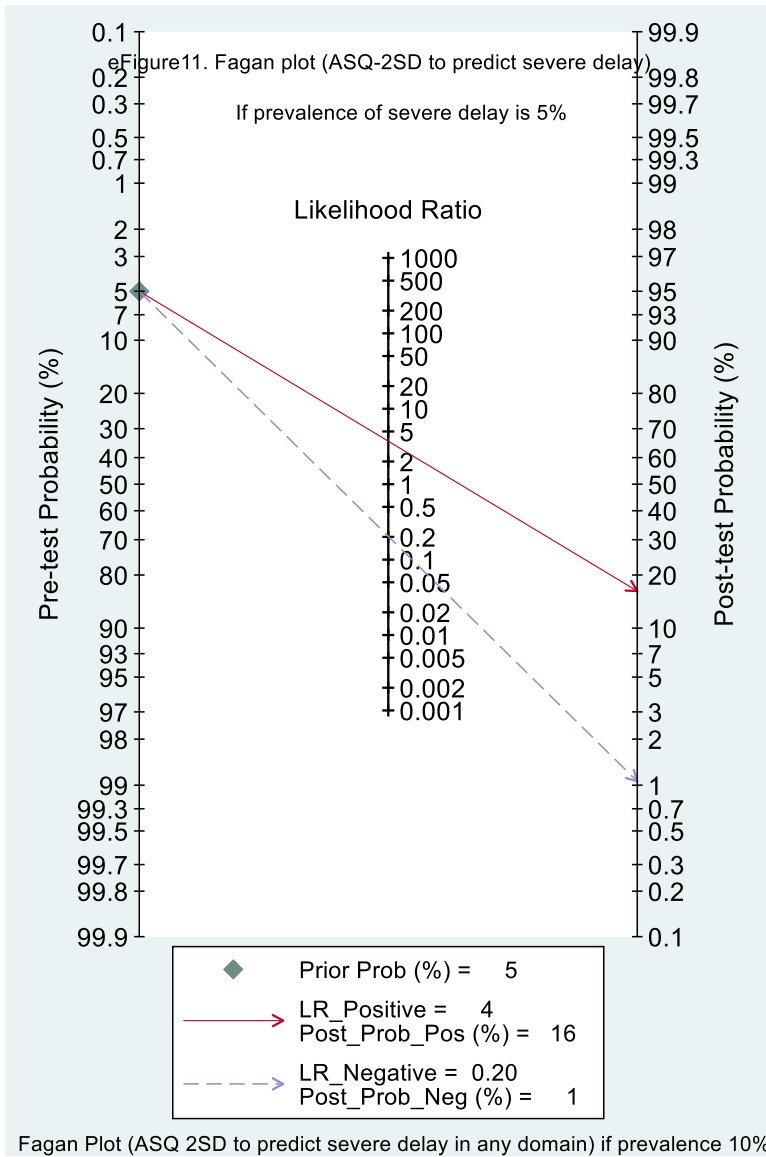

**eTable4: Post-test probabilities for various pre-test prevalence of “severe delay” based on the results of ASQ-2SD**

| Pre-test probability of “severe delay” | Post-test probability of “severe delay” if the child <b>fails</b> on ASQ-2SD | Post-test probability of “severe delay” if the child <b>passes</b> on ASQ-2SD |
|----------------------------------------|------------------------------------------------------------------------------|-------------------------------------------------------------------------------|
| 5%                                     | 16%                                                                          | 1%                                                                            |
| 10%                                    | 29%                                                                          | 2%                                                                            |
| 15%                                    | 40%                                                                          | 3%                                                                            |
| 20%                                    | 48%                                                                          | 5%                                                                            |

**eTable5: Results of studies included in the systematic review, but could not be pooled in the meta-analysis**

| Study ID                          | Results                                                                                                                                                                                                                                                                                                                                                                                                                                                                                 | Author's conclusions                                                                                                                                                                                                                                                                                                                                                                           |
|-----------------------------------|-----------------------------------------------------------------------------------------------------------------------------------------------------------------------------------------------------------------------------------------------------------------------------------------------------------------------------------------------------------------------------------------------------------------------------------------------------------------------------------------|------------------------------------------------------------------------------------------------------------------------------------------------------------------------------------------------------------------------------------------------------------------------------------------------------------------------------------------------------------------------------------------------|
| <b>Colbert_2021<sup>37</sup></b>  | Internal consistency reliability for the ASQ was adequate. Test-retest reliability ranged from low to moderate ( $r = 0.08-0.43$ ; $p < 0.05-0.01$ ). There was significant variability in mean scores over time across ASQ domain scores. In terms of validity, the ASQ did not discriminate adequately between children who performed within or below age-expectations on performance-based developmental testing (Mullen Scales of Early Learning).                                  | The ASQ did not demonstrate adequate psychometric properties in rural Guatemala. These results indicate that existing caregiver report screening measures of early childhood development should be utilized with caution in low resource settings, and alternative methods for assessment or in the development and utilization of caregiver report measures should be considered.             |
| <b>Fuengfoo_2020<sup>39</sup></b> | Concurrent ASQ-3, Thai version compared with BSID-III had a sensitivity of 78.6%, 96.7%, and 83.3% among children at 12, 30 and 36 months old, respectively. The specificity was at 90.3%, 95.7%, and 98.7% among 12, 30 and 36-month-old children, respectively. The validity for 30-month-old children was very high and had almost perfect kappa agreement of 0.81 to 1, while the validity among children at 12 and 36-month-old was substantial (kappa agreement of 0.67 to 0.86). | ASQ-3, Thai version is a suitable developmental screening tool for children at 12, 30 and 36 months old in time-limited circumstances and with insufficient health personnel. The validity of the ASQ-3, Thai version is acceptable when compared to the standardized Bayley-III. The questionnaire is faster to complete than the child development progress assessment using the Bayley-III. |
| <b>Ga_2011B<sup>40</sup></b>      | Concurrent K-ASQ2 $>2SD$ from the mean in any domain to predict cognitive or language delay using Capute scale (DQ $<75$ ) found sensitivity, specificity, PPV, NPV, PLR and NLR of 0.90, 0.63, 0.65, 0.89, 2.41, 0.16                                                                                                                                                                                                                                                                  | K-ASQ showed relatively high concurrent validity with DQ 75 on the Capute scale.                                                                                                                                                                                                                                                                                                               |
| <b>Ga_2011C<sup>40</sup></b>      | Concurrent K-ASQ2 $>2SD$ from the mean in any domain to predict cognitive or language delay using Capute scale (DQ $<85$ ) found sensitivity, specificity, PPV, NPV, PLR and NLR of 0.76, 0.75, 0.87, 0.59, 3.05, 0.32                                                                                                                                                                                                                                                                  | K-ASQ showed moderate concurrent validity with DQ 85 in the Capute scale                                                                                                                                                                                                                                                                                                                       |
| <b>Ga_2011D<sup>40</sup></b>      | Concurrent K-ASQ2 $>2SD$ from the mean in any domain to predict motor delay using AIMS (below 10 <sup>th</sup> percentile) found sensitivity, specificity, PPV, NPV, PLR and NLR of 0.80, .077, 0.78, 0.78, 3.4, 0.26.                                                                                                                                                                                                                                                                  | K-ASQ showed relatively high concurrent validity with DQ 75 in the Capute scale                                                                                                                                                                                                                                                                                                                |

|                                          |                                                                                                                                                                                                                                                                      |                                                                                                                                                                                                                                                                                                                            |
|------------------------------------------|----------------------------------------------------------------------------------------------------------------------------------------------------------------------------------------------------------------------------------------------------------------------|----------------------------------------------------------------------------------------------------------------------------------------------------------------------------------------------------------------------------------------------------------------------------------------------------------------------------|
| <b>Gutierrez-Cruz_2019</b> <sup>42</sup> | The correlation between the language assessment with the revised Brunet-Lézine scale and the ASQ-3 questionnaire was good, with a Pearson correlation coefficient of 0.7 ( $p < 0.001$ )                                                                             | Late preterm infants have less language development at two years of age. Prematurity and male gender are risk factors for alterations. The assessment of language with the ASQ-3 questionnaire can be useful to detect alterations.                                                                                        |
| <b>Halbwachs_2013</b> <sup>43</sup>      | An ASQ cut-off value of 285 had optimal discriminatory power for identifying children with IQ scores <85. ASQ values <285 were significantly associated with a higher risk of sub-optimal neurologic outcomes (sensitivity of 0.80, specificity of 0.54 for IQ <85). | ASQ at five years is a simple and cost-effective tool that can detect a severe developmental delay in preterm children regardless of maternal education level, while its capacity to identify children with mild delay appears to be limited.                                                                              |
| <b>Klamer_2005</b> <sup>51</sup>         | The overall ASQ score correlated significantly with IQ ( $p=0.007$ ). The children born extremely preterm had an ASQ score of 71.06 SD below the score of the term children ( $p=0.048$ ).                                                                           | The ASQ may serve as a useful tool to measure developmental deficit in groups of children born preterm and serve as a low-cost research tool.                                                                                                                                                                              |
| <b>Kwun_2015A</b> <sup>52</sup>          | If $\geq$ one ASQ (Korean) domain failed is compared to MDI <85, the sensitivity, specificity, PPV, and NPV are 0.58, 0.80, 0.52, and 0.84, respectively.                                                                                                            | The ASQ (Korean) showed low validity in comparison to MDI and PDI of BSID-II in preterm infants at a corrected age of 18-24 months. However, the communication domain showed moderate correlations with MDI. The failure in more than one domain of the ASQ (Korean) was significantly correlated with the failure in MDI. |
| <b>Kwun_2015B</b> <sup>52</sup>          | If $\geq$ one ASQ (Korean) domain failed is compared to PDI <85, the sensitivity, specificity, PPV, and NPV are 0.5, 0.73, 0.19, and 0.92, respectively.                                                                                                             |                                                                                                                                                                                                                                                                                                                            |
| <b>Kim_2010B</b> <sup>49</sup>           | The sensitivity of K-ASQ (1SD) compared with Bayley-III (2 SD) at 18 months was 0.72, the specificity was 0.93                                                                                                                                                       | ASQ was created for the purpose of screening the entire population during the development process. It has high specificity. Because of low sensitivity, ASQ as a screening test may have some limitations in preterm infants. K-ASQ showed a higher sensitivity at 18 months than at 8 months.                             |
| <b>Srinithiwat_2014A</b> <sup>71</sup>   | A fair to moderate agreement (Kappa agreement = 0.338-0.606) was found between the ASQ-3 Thai and the DDSTII. Sensitivity of the ASQ-3 Thai (2SD) with DDST-II (1SD) at the age of 18 months was 66.7%. Specificity was 78.6%.                                       | Due to a fair to moderate agreement but low sensitivity between the ASQ-3 Thai and DDST-II, other validated tools should accompany the clinical usage of the tool. Further investigations are needed to support its usage, particularly the validation of the tool with other standardized developmental diagnostic tools. |
| <b>Srinithiwat_2014B</b> <sup>71</sup>   | Sensitivity of the ASQ-3 Thai (2SD) with DDST-II (1SD) at the age of 24 months was 88.2%. Specificity was 71.4%.                                                                                                                                                     |                                                                                                                                                                                                                                                                                                                            |
| <b>Srinithiwat_2014C</b> <sup>71</sup>   | Sensitivity of the ASQ-3 Thai (2SD) with DDST-II (1SD) at the age of 30 months was 54.5%. Specificity was 90.9%.                                                                                                                                                     |                                                                                                                                                                                                                                                                                                                            |

**eTable6: Summary of Findings and Certainty of Evidence: Should ASQ at 2SD be used to diagnose Any developmental delay in children aged 12-60 months?**

| Sensitivity            |                                | 0.77 (95% CI: 0.64 to 0.86)        |                                                 | Prevalences 10% 15% 20% |                           |             |                                                        |                                |                             |                             |                   |
|------------------------|--------------------------------|------------------------------------|-------------------------------------------------|-------------------------|---------------------------|-------------|--------------------------------------------------------|--------------------------------|-----------------------------|-----------------------------|-------------------|
| Specificity            |                                | 0.81 (95% CI: 0.75 to 0.86)        |                                                 |                         |                           |             |                                                        |                                |                             |                             |                   |
| Outcome                | No of studies (No of patients) | Study design                       | Factors that may decrease certainty of evidence |                         |                           |             |                                                        | Effect per 100 patients tested |                             |                             | Test accuracy CoE |
|                        |                                |                                    | Risk of bias                                    | Indirectness            | Inconsistency             | Imprecision | Other considerations                                   | pre-test probability of 10%    | pre-test probability of 15% | pre-test probability of 20% |                   |
| <b>True positives</b>  | 16 studies<br>6089 patients    | cohort & case-control type studies | serious <sup>a</sup>                            | not serious             | very serious <sup>b</sup> | not serious | Strong association;<br><br>Publication bias undetected | 8 (6 to 9)                     | 12 (10 to 13)               | 15 (13 to 17)               | ⊕⊕○<br>○<br>Low   |
| <b>False negatives</b> |                                |                                    |                                                 |                         |                           |             |                                                        | 2 (1 to 4)                     | 3 (2 to 5)                  | 5 (3 to 7)                  |                   |
| <b>True negatives</b>  | 16 studies<br>6089 patients    | cohort & case-control type studies | serious <sup>a</sup>                            | not serious             | very serious <sup>b</sup> | not serious | Strong association<br><br>Publication bias undetected  | 73 (68 to 79)                  | 69 (64 to 75)               | 65 (60 to 70)               | ⊕⊕○<br>○<br>Low   |
| <b>False positives</b> |                                |                                    |                                                 |                         |                           |             |                                                        | 17 (11 to 22)                  | 16 (10 to 21)               | 15 (10 to 20)               |                   |

## Explanations

- a. Nearly 50% of included studies had high or unclear risk of bias in one or more domains
- b. Very high statistical heterogeneity

**eTable7: Summary of Findings and Certainty of Evidence: Should ASQ at 2SD be used to diagnose “Severe delay” in children aged 12-60 months?**

| Sensitivity            |                              | 0.84 (95% CI: 0.75 to 0.90)        |                                                 | Prevalences  |                           |             | 10%                                              | 15%                            | 20%                         |                             |                   |
|------------------------|------------------------------|------------------------------------|-------------------------------------------------|--------------|---------------------------|-------------|--------------------------------------------------|--------------------------------|-----------------------------|-----------------------------|-------------------|
| Specificity            |                              | 0.77 (95% CI: 0.71 to 0.82)        |                                                 |              |                           |             |                                                  |                                |                             |                             |                   |
| Outcome                | № of studies (№ of patients) | Study design                       | Factors that may decrease certainty of evidence |              |                           |             |                                                  | Effect per 100 patients tested |                             |                             | Test accuracy CoE |
|                        |                              |                                    | Risk of bias                                    | Indirectness | Inconsistency             | Imprecision | Other considerations                             | pre-test probability of 10%    | pre-test probability of 15% | pre-test probability of 20% |                   |
| <b>True positives</b>  | 15 studies<br>3942 patients  | cohort & case-control type studies | serious <sup>a</sup>                            | not serious  | very serious <sup>b</sup> | not serious | Strong association;<br>Publication bias unlikely | 8 (8 to 9)                     | 13 (11 to 14)               | 17 (15 to 18)               | ⊕⊕○<br>○<br>Low   |
| <b>False negatives</b> |                              |                                    |                                                 |              |                           |             |                                                  | 2 (1 to 2)                     | 2 (1 to 4)                  | 3 (2 to 5)                  |                   |
| <b>True negatives</b>  | 15 studies<br>3942 patients  | cohort & case-control type studies | serious <sup>a</sup>                            | not serious  | very serious <sup>b</sup> | not serious | Strong association;<br>Publication bias unlikely | 69 (64 to 74)                  | 65 (60 to 70)               | 62 (57 to 66)               | ⊕⊕○<br>○<br>Low   |
| <b>False positives</b> |                              |                                    |                                                 |              |                           |             |                                                  | 21 (16 to 26)                  | 20 (15 to 25)               | 18 (14 to 23)               |                   |

## Explanations

c. Nearly 50% of studies had high or unclear risk of bias in many domains

d. Substantial statistical heterogeneity (I<sup>2</sup>>90%)

**eTable 8: Summary of Findings and Certainty of Evidence: Should ASQ Motor domain at 2SD be used to diagnose “Any motor delay” in children aged 12-60 months?**

| Sensitivity            |                                | 0.41 (95% CI: 0.26 to 0.57)        |                                                 |              |                           |             | Prevalences 10% 15% 20%                                             |                                |                             |                             |                       |
|------------------------|--------------------------------|------------------------------------|-------------------------------------------------|--------------|---------------------------|-------------|---------------------------------------------------------------------|--------------------------------|-----------------------------|-----------------------------|-----------------------|
| Specificity            |                                | 0.94 (95% CI: 0.87 to 0.97)        |                                                 |              |                           |             |                                                                     |                                |                             |                             |                       |
| Outcome                | No of studies (No of patients) | Study design                       | Factors that may decrease certainty of evidence |              |                           |             |                                                                     | Effect per 100 patients tested |                             |                             | Test accuracy CoE     |
|                        |                                |                                    | Risk of bias                                    | Indirectness | Inconsistency             | Imprecision | Other considerations                                                | pre-test probability of 10%    | pre-test probability of 15% | pre-test probability of 20% |                       |
| <b>True positives</b>  | 7 studies<br>1417 patients     | cohort & case-control type studies | serious <sup>a</sup>                            | not serious  | very serious <sup>b</sup> | not serious | publication bias strongly suspected <sup>c</sup>                    | 4 (3 to 6)                     | 6 (4 to 9)                  | 8 (5 to 11)                 | ⊕○○○<br>○<br>Very low |
| <b>False negatives</b> |                                |                                    |                                                 |              |                           |             |                                                                     | 6 (4 to 7)                     | 9 (6 to 11)                 | 12 (9 to 15)                |                       |
| <b>True negatives</b>  | 7 studies<br>1417 patients     | cohort & case-control type studies | serious <sup>a</sup>                            | not serious  | very serious <sup>b</sup> | not serious | publication bias strongly suspected strong association <sup>c</sup> | 85 (78 to 87)                  | 80 (74 to 82)               | 75 (70 to 78)               | ⊕○○○<br>○<br>Very low |
| <b>False positives</b> |                                |                                    |                                                 |              |                           |             |                                                                     | 5 (3 to 12)                    | 5 (3 to 11)                 | 5 (2 to 10)                 |                       |

## Explanations

e. many of the included studies had unclear or high risk of bias in some of the domains

f. Significant statistical heterogeneity

g. Only 7 studies included, publication bias could not be assessed.





**eTable10: Summary of Findings and Certainty of Evidence: Should ASQ-cognitive/language domain at 2SD be used to diagnose “any cognitive/language delay” in Children aged 12-60 months?**

| Sensitivity            |                                | 0.44 (95% CI: 0.24 to 0.65)        |                                                 | Prevalences 10% 15% 20% |                           |                      |                                                                     |                                |                             |                             |                                    |
|------------------------|--------------------------------|------------------------------------|-------------------------------------------------|-------------------------|---------------------------|----------------------|---------------------------------------------------------------------|--------------------------------|-----------------------------|-----------------------------|------------------------------------|
| Specificity            |                                | 0.93 (95% CI: 0.81 to 0.95)        |                                                 |                         |                           |                      |                                                                     |                                |                             |                             |                                    |
| Outcome                | No of studies (No of patients) | Study design                       | Factors that may decrease certainty of evidence |                         |                           |                      |                                                                     | Effect per 100 patients tested |                             |                             | Test accuracy CoE                  |
|                        |                                |                                    | Risk of bias                                    | Indirectness            | Inconsistency             | Imprecision          | Other considerations                                                | pre-test probability of 10%    | pre-test probability of 15% | pre-test probability of 20% |                                    |
| <b>True positives</b>  | 2 studies<br>697 patients      | cohort & case-control type studies | not serious <sup>a</sup>                        | not serious             | very serious <sup>b</sup> | serious <sup>c</sup> | publication bias strongly suspected <sup>d</sup>                    | 4 (2 to 7)                     | 7 (4 to 10)                 | 9 (5 to 13)                 | ⊕○○○<br>○<br>Very low <sup>b</sup> |
| <b>False negatives</b> |                                |                                    |                                                 |                         |                           |                      |                                                                     | 6 (3 to 8)                     | 8 (5 to 11)                 | 11 (7 to 15)                |                                    |
| <b>True negatives</b>  | 2 studies<br>697 patients      | cohort & case-control type studies | not serious <sup>a</sup>                        | not serious             | very serious <sup>b</sup> | not serious          | publication bias strongly suspected strong association <sup>d</sup> | 84 (73 to 86)                  | 79 (69 to 81)               | 74 (65 to 76)               | ⊕⊕○○○<br>Low                       |
| <b>False positives</b> |                                |                                    |                                                 |                         |                           |                      |                                                                     | 6 (4 to 17)                    | 6 (4 to 16)                 | 6 (4 to 15)                 |                                    |

## Explanations

- i. both studies didn't have any risk of bias in almost all the domains
- j. Very high statistical heterogeneity ( $I^2 > 80\%$ )
- k. wide confidence intervals
- l. Publication bias could not be assessed in view of less than 10 studies



**eTable12: Summary of Findings and Certainty of Evidence:: Should ASQ at 1SD be used to diagnose “any delay” in children aged 12-60 months?**

| Sensitivity            |                                | 0.79 (95% CI: 0.63 to 0.90)        |                                                 | Prevalences  |                           |             | 10%                                              | 15%                            | 20%                         |                             |                       |
|------------------------|--------------------------------|------------------------------------|-------------------------------------------------|--------------|---------------------------|-------------|--------------------------------------------------|--------------------------------|-----------------------------|-----------------------------|-----------------------|
| Specificity            |                                | 0.67 (95% CI: 0.42 to 0.85)        |                                                 |              |                           |             |                                                  |                                |                             |                             |                       |
| Outcome                | No of studies (No of patients) | Study design                       | Factors that may decrease certainty of evidence |              |                           |             |                                                  | Effect per 100 patients tested |                             |                             | Test accuracy CoE     |
|                        |                                |                                    | Risk of bias                                    | Indirectness | Inconsistency             | Imprecision | Other considerations                             | pre-test probability of 10%    | pre-test probability of 15% | pre-test probability of 20% |                       |
| <b>True positives</b>  | 4 studies<br>798 patients      | cohort & case-control type studies | serious <sup>a</sup>                            | not serious  | serious <sup>b</sup>      | not serious | publication bias strongly suspected <sup>c</sup> | 8 (6 to 9)                     | 12 (9 to 14)                | 16 (13 to 18)               | ⊕○○○<br>○<br>Very low |
| <b>False negatives</b> |                                |                                    |                                                 |              |                           |             |                                                  | 2 (1 to 4)                     | 3 (1 to 6)                  | 4 (2 to 7)                  |                       |
| <b>True negatives</b>  | 4 studies<br>798 patients      | cohort & case-control type studies | serious <sup>a</sup>                            | not serious  | very serious <sup>d</sup> | not serious | publication bias strongly suspected <sup>c</sup> | 60 (38 to 77)                  | 57 (36 to 72)               | 54 (34 to 68)               | ⊕○○○<br>○<br>Very low |
| <b>False positives</b> |                                |                                    |                                                 |              |                           |             |                                                  | 30 (13 to 52)                  | 28 (13 to 49)               | 26 (12 to 46)               |                       |

## Explanations

p. 3 of the included studies had unclear risk of bias in many domains

b. I<sup>2</sup> = 75%

c. Publication bias could not be assessed in view of less than 10 studies

d. I<sup>2</sup> = 92%

**eTable 13: Summary of Findings and Certainty of Evidence: Should ASQ-1SD be used to diagnose “severe delay” in children?**

| Sensitivity                                                                                       |                                | 0.88 (95% CI: 0.73 to 0.95)        |                                                 |              |                      |                      |                                                                     |                                |                             |                             |                   |
|---------------------------------------------------------------------------------------------------|--------------------------------|------------------------------------|-------------------------------------------------|--------------|----------------------|----------------------|---------------------------------------------------------------------|--------------------------------|-----------------------------|-----------------------------|-------------------|
| Specificity                                                                                       |                                | 0.53 (95% CI: 0.35 to 0.71)        |                                                 |              |                      |                      |                                                                     |                                |                             |                             |                   |
|                                                                                                   |                                | Prevalences                        |                                                 |              |                      |                      |                                                                     |                                |                             |                             |                   |
|                                                                                                   |                                | 5%                                 | 10%                                             | 15%          |                      |                      |                                                                     |                                |                             |                             |                   |
| Outcome                                                                                           | No of studies (No of patients) | Study design                       | Factors that may decrease certainty of evidence |              |                      |                      |                                                                     | Effect per 100 patients tested |                             |                             | Test accuracy CoE |
|                                                                                                   |                                |                                    | Risk of bias                                    | Indirectness | Inconsistency        | Imprecision          | Other considerations                                                | pre-test probability of 5%     | pre-test probability of 10% | pre-test probability of 15% |                   |
| <b>True positives</b> (patients with severe developmental delay)                                  | 3 studies<br>773 patients      | cohort & case-control type studies | serious <sup>a</sup>                            | not serious  | serious <sup>b</sup> | not serious          | publication bias strongly suspected strong association <sup>c</sup> | 4 (4 to 5)                     | 9 (7 to 10)                 | 13 (11 to 14)               | ⊕⊕○○<br>Low       |
| <b>False negatives</b> (patients incorrectly classified as not having severe developmental delay) |                                |                                    |                                                 |              |                      |                      |                                                                     | 1 (0 to 1)                     | 1 (0 to 3)                  | 2 (1 to 4)                  |                   |
| <b>True negatives</b> (patients without severe developmental delay)                               | 3 studies<br>773 patients      | cohort & case-control type studies | serious <sup>a</sup>                            | not serious  | serious <sup>b</sup> | serious <sup>d</sup> | publication bias strongly suspected <sup>c</sup>                    | 50 (33 to 67)                  | 48 (32 to 64)               | 45 (30 to 60)               | ⊕○○○<br>Very low  |
| <b>False positives</b> (patients incorrectly classified as having severe developmental delay)     |                                |                                    |                                                 |              |                      |                      |                                                                     | 45 (28 to 62)                  | 42 (26 to 58)               | 40 (25 to 55)               |                   |

#### Explanations

- a. high or unclear ROB in at least one or more domains  
 b. I2 90%  
 c. Publication bias could not be assessed due to only 3 included studies  
 d. Wide CI

**eTable14: Summary of Findings and Certainty of Evidence: Question: Should ASQ motor domain at 1SD be used to diagnose "any motor delay" in children aged 12-60 months?**

| Sensitivity            |                                | 0.64 (95% CI: 0.53 to 0.73)        |                                                 |              |                           |             |                                                  |                                |                             |                             |                       |
|------------------------|--------------------------------|------------------------------------|-------------------------------------------------|--------------|---------------------------|-------------|--------------------------------------------------|--------------------------------|-----------------------------|-----------------------------|-----------------------|
| Specificity            |                                | 0.79 (95% CI: 0.70 to 0.85)        |                                                 |              |                           |             |                                                  |                                |                             |                             |                       |
| Outcome                | No of studies (No of patients) | Study design                       | Factors that may decrease certainty of evidence |              |                           |             |                                                  | Effect per 100 patients tested |                             |                             | Test accuracy CoE     |
|                        |                                |                                    | Risk of bias                                    | Indirectness | Inconsistency             | Imprecision | Other considerations                             | pre-test probability of 10%    | pre-test probability of 15% | pre-test probability of 20% |                       |
| <b>True positives</b>  | 6 studies<br>2322 patients     | cohort & case-control type studies | serious <sup>a</sup>                            | not serious  | very serious <sup>b</sup> | not serious | publication bias strongly suspected <sup>c</sup> | 6 (5 to 7)                     | 10 (8 to 11)                | 13 (11 to 15)               | ⊕○○○<br>○<br>Very low |
| <b>False negatives</b> |                                |                                    |                                                 |              |                           |             |                                                  | 4 (3 to 5)                     | 5 (4 to 7)                  | 7 (5 to 9)                  |                       |
| <b>True negatives</b>  | 6 studies<br>2322 patients     | cohort & case-control type studies | serious <sup>a</sup>                            | not serious  | very serious <sup>b</sup> | not serious | publication bias strongly suspected <sup>c</sup> | 71 (63 to 77)                  | 67 (60 to 72)               | 63 (56 to 68)               | ⊕○○○<br>○<br>Very low |
| <b>False positives</b> |                                |                                    |                                                 |              |                           |             |                                                  | 19 (13 to 27)                  | 18 (13 to 25)               | 17 (12 to 24)               |                       |

## Explanations

- q. 4 of the included studies had high/unclear risk of bias in some domains
- r. Very high statistical heterogeneity ( $I^2 > 80$ )
- s. Publication bias could not be assessed in view of less than 10 studies

**eTable15: Summary of Findings and Certainty of Evidence: Question: Should ASQ motor domain at 1SD be used to diagnose severe motor delay in children aged 12-60 months?**

No data

**eTable16: Summary of Findings and Certainty of Evidence: Should ASQ- cognitive/language at 1SD be used to diagnose “any cognitive/language delay” in children aged 12-60 months?**

|             |                             |             |     |     |     |
|-------------|-----------------------------|-------------|-----|-----|-----|
| Sensitivity | 0.58 (95% CI: 0.39 to 0.75) |             |     |     |     |
| Specificity | 0.79 (95% CI: 0.71 to 0.85) |             |     |     |     |
|             |                             | Prevalences | 10% | 15% | 20% |

| Outcome                | No of studies (No of patients) | Study design                       | Factors that may decrease certainty of evidence |              |                           |             |                                                  | Effect per 100 patients tested |                             |                             | Test accuracy CoE     |
|------------------------|--------------------------------|------------------------------------|-------------------------------------------------|--------------|---------------------------|-------------|--------------------------------------------------|--------------------------------|-----------------------------|-----------------------------|-----------------------|
|                        |                                |                                    | Risk of bias                                    | Indirectness | Inconsistency             | Imprecision | Other considerations                             | pre-test probability of 10%    | pre-test probability of 15% | pre-test probability of 20% |                       |
| <b>True positives</b>  | 4 studies<br>2954 patients     | cohort & case-control type studies | serious <sup>a</sup>                            | not serious  | very serious <sup>b</sup> | not serious | publication bias strongly suspected <sup>c</sup> | 6 (4 to 8)                     | 9 (6 to 11)                 | 12 (8 to 15)                | ⊕○○○<br>○<br>Very low |
| <b>False negatives</b> |                                |                                    |                                                 |              |                           |             |                                                  | 4 (2 to 6)                     | 6 (4 to 9)                  | 8 (5 to 12)                 |                       |
| <b>True negatives</b>  | 4 studies<br>2954 patients     | cohort & case-control type studies | serious <sup>a</sup>                            | not serious  | very serious <sup>b</sup> | not serious | publication bias strongly suspected <sup>c</sup> | 71 (64 to 77)                  | 67 (60 to 72)               | 63 (57 to 68)               | ⊕○○○<br>○<br>Very low |
| <b>False positives</b> |                                |                                    |                                                 |              |                           |             |                                                  | 19 (13 to 26)                  | 18 (13 to 25)               | 17 (12 to 23)               |                       |

## Explanations

- a. 3 of the included studies had unclear risk of bias in some domains
- b. Very high statistical heterogeneity ( $I^2 > 90\%$ )
- c. Publication bias could not be assessed in view of less than 10 studies

**eTable17: Summary of Findings and Certainty of Evidence: Question: Should ASQ- cognitive/language at 1SD be used to diagnose “severe cognitive/language delay” in children aged 12-60 months?**

No data.

**eTable18: Results of sensitivity analyses**

| <b>ASQ details</b>                                                                | <b>N. of studies/<br/>N. of<br/>comparisons/<br/>Sample size</b>      | <b>Sensitivity<br/>(95% CI)</b>                           | <b>Specificity<br/>(95% CI)</b>                         | <b>PLR<br/>(95% CI)</b> | <b>NLR<br/>(95% CI)</b>      | <b>DOR<br/>(95% CI)</b> | <b>AUC<br/>(95% CI)</b>      |
|-----------------------------------------------------------------------------------|-----------------------------------------------------------------------|-----------------------------------------------------------|---------------------------------------------------------|-------------------------|------------------------------|-------------------------|------------------------------|
| <b>ASQ 2SD to<br/>predict any<br/>delay (using<br/>only ASQ<br/>version 3)</b>    | <b>8/9/2370<br/>47A,53A,<br/>53B, 56, 58A,<br/>59,60, 61,65A</b>      | <b>0.69<br/>(0.53, 0.81)<br/><br/>I<sup>2</sup>=93.8%</b> | <b>0.85 (0.79,<br/>0.90)<br/><br/>I<sup>2</sup>=92%</b> | <b>4.6 (3.0, 7.1)</b>   | <b>0.37 (0.23,<br/>0.58)</b> | <b>13 (6, 28)</b>       | <b>0.86 (0.83,<br/>0.89)</b> |
| <b>ASQ 2SD to<br/>predict severe<br/>delay (using<br/>only ASQ<br/>version 3)</b> | <b>8/9/2517<br/>19,20, 34,35A,<br/>35B,47B,<br/>58B,<br/>65B, 67A</b> | <b>0.80 (0.64,<br/>0.90)<br/><br/>I<sup>2</sup>=89.8%</b> | <b>0.79 (0.71,<br/>0.85)<br/><br/>I<sup>2</sup>=95%</b> | <b>3.8 (3.0, 4.8)</b>   | <b>0.25 (0.14,<br/>0.46)</b> | <b>15<br/>(8, 28)</b>   | <b>0.86 (0.82,<br/>0.88)</b> |

|                                                                            |                                          |                                                |                                                |                 |                   |                  |                   |
|----------------------------------------------------------------------------|------------------------------------------|------------------------------------------------|------------------------------------------------|-----------------|-------------------|------------------|-------------------|
| ASQ 2SD to predict any delay (using only ASQ version 2)                    | 6/6/3588<br>3,4, 41A, 46, 54, 68A        | 0.83 (0.56, 0.95)<br><br>I <sup>2</sup> =95.7% | 0.76 (0.64, 0.85)<br><br>I <sup>2</sup> =98%   | 3.5 (2.5, 4.7)  | 0.23 (0.09, 0.60) | 15 (6, 38)       | 0.84 (0.80, 0.87) |
| ASQ 2SD to predict severe delay (using only ASQ version 2)                 | 6/7/1393<br>40A,41B, 44,45A, 45B,68B, 69 | 0.87 (0.76, 0.93)<br><br>I <sup>2</sup> =73.7% | 0.73 (0.62, 0.83)<br><br>I <sup>2</sup> =92.2% | 3.3 (2.2, 4.8)  | 0.18 (0.10, 0.33) | 18 (8, 39)       | 0.87 (0.84, 0.90) |
| ASQ 2SD to predict any delay (using only studies with low risk of bias)    | 2/2/761<br>60, 65A                       | 0.36 (0.12 0.69)<br><br>I <sup>2</sup> =89.7   | 0.89 (0.56, 0.98)<br><br>I <sup>2</sup> =89.7  | 3.9 (0.51 21.2) | 0.72 (0.27 1.9)   | 4.6 (0.55, 37.7) | 0.68 (0.43, 0.86) |
| ASQ 2SD to predict severe delay (using only studies with low risk of bias) | 5/6/1684<br>19, 20, 45A, 45B, 65B, 67A   | 0.84 (0.61, 0.95)<br><br>I <sup>2</sup> =94.5% | 0.75 (0.63, 0.84)<br><br>I <sup>2</sup> =96.2% | 3.3 (2.5, 4.5)  | 0.21 (0.08, 0.54) | 16 (6, 39)       | 0.84 (0.81, 0.87) |



|                                                                          |                                                                                          |                                            |                                            |                |                   |            |                   |
|--------------------------------------------------------------------------|------------------------------------------------------------------------------------------|--------------------------------------------|--------------------------------------------|----------------|-------------------|------------|-------------------|
| ASQ 2SD to predict any delay (using studies having sample size > 145)    | 10/10/5645<br>3, 4, 46, 47A, 54, 59, 60, 61, 65A, 68A                                    | 0.79 (0.61, 0.91)<br>I <sup>2</sup> =97.1% | 0.80 (0.71,0.87)<br>I <sup>2</sup> =98.1%  | 4 (2.8, 5.7)   | 0.26 (0.13, 0.51) | 16 (7, 35) | 0.86 (0.83, 0.89) |
| ASQ 2SD to predict severe delay (using studies having sample size > 145) | 7/8/3203<br>20, 35A,35B, 47B, 65B, 67A, 68B, 69                                          | 0.83 (0.64, 0.93)<br>I <sup>2</sup> =93.2% | 0.75 (0.65, 0.84)<br>I <sup>2</sup> =98%   | 3.4 (2.5, 4.5) | 0.23 (0.11, 0.47) | 15 (7, 31) | 0.85 (0.81, 0.87) |
| ASQ 2SD to predict any delay (using only prospective studies)            | 15/17/6022<br>3, 4, 41A, 46, 47A, 53A, 53B, 54, 55A, 58A, 59, 60, 61, 63A, 63C, 65A, 68A | 0.78 (0.64, 0.87)<br>I <sup>2</sup> =95.2% | 0.82 (0.75, 0.86)<br>I <sup>2</sup> =96.8% | 4.2 (3.2, 5.4) | 0.27 (0.17, 0.45) | 15 (8, 28) | 0.86 (0.83, 0.89) |
| ASQ 2SD to predict any delay (using only retrospective studies)          | Only one study (56)                                                                      |                                            |                                            |                |                   |            |                   |

|                                                                    |                                                                                               |                                               |                                               |                   |                      |                    |                            |
|--------------------------------------------------------------------|-----------------------------------------------------------------------------------------------|-----------------------------------------------|-----------------------------------------------|-------------------|----------------------|--------------------|----------------------------|
| ASQ 2SD to predict severe delay (using only prospective studies)   | 13/15/3686<br>19,20,34, 35A,<br>35B, 41B, 45A,<br>45B, 47B, 55B,<br>58B, 65B, 67A,<br>68B, 69 | 0.85 (0.74,<br>0.92)<br>I <sup>2</sup> =88.2% | 0.77 (0.70,<br>0.82)<br>I <sup>2</sup> =96.5% | 3.6 (2.9, 4.6)    | 0.19 (0.11,<br>0.34) | 19 (10, 34)        | 0.86 (0.83,<br>0.89)       |
| ASQ 2SD to predict severe delay (using only retrospective studies) | 2/2/256<br>40A, 44                                                                            | 0.82<br>(0 .68, 0.91)<br>I <sup>2</sup> =0%   | 0.82<br>(0.69,0.91)<br>I <sup>2</sup> =0%     | 4.7<br>(2.3, 9.4) | 0.22 (0.11,<br>0.43) | 21.8<br>(8.2,57.8) | 0.82<br>(0.74,0.88)        |
| ASQ 2SD to predict any delay on BISD II                            | 3/3/242<br>41A, 55A, 68A                                                                      | 0.52 (0.42<br>0.63)<br>I <sup>2</sup> =1%     | 0.84 (0.76<br>0.90)<br>I <sup>2</sup> =1%     | 3.3<br>(2.0 5.6)  | 0.56<br>(0.39 0.81)  | 5.9<br>(3.1, 11.0) | (0.71, (0<br>.64,<br>0.77) |
| ASQ 2SD to predict severe delay on BISD II                         | 7/8/1583<br>35A, 41B, 44,<br>45A, 45B, 55B,<br>68B, 69                                        | 0.89 (0.80,<br>0.94)<br>I <sup>2</sup> =75.1% | 0.76 (0.65,<br>0.84)<br>I <sup>2</sup> =96.2  | 3.7 (2.5, 5.4)    | 0.15 (0.8,<br>0.27)  | 25 (11, 59)        | 0.90 (87,<br>0.92)         |

|                                                          |                                                     |                                               |                                               |                |                      |            |                      |
|----------------------------------------------------------|-----------------------------------------------------|-----------------------------------------------|-----------------------------------------------|----------------|----------------------|------------|----------------------|
| ASQ 2SD to predict any delay on Bayley-III               | 7/8/2009<br>47A,53A,<br>53B, 54, 56, 60,<br>61, 65A | 0.70 (0.54,<br>0.83)<br>I <sup>2</sup> =92.2% | 0.81 (0.76,<br>0.85)<br>I <sup>2</sup> =82.9% | 3.7 (3.0. 4.7) | 0.36 (0.22,<br>0.59) | 10 (5, 19) | 0.84 (0.80,<br>0.87) |
| ASQ 2SD to predict severe delay on Bayley-III            | 5/5/1625<br>19, 34, 47B, 65B,<br>67A                | 0.75 (0.50,<br>0.90)<br>I <sup>2</sup> =73.8% | 0.80 (0.74<br>0.85)<br>I <sup>2</sup> =86.5%  | 3.7 (2.8 4.9)  | 0.32 (0.15<br>0.68)  | 12 (5, 30) | 0.84 (0.80<br>0.87)  |
| ASQ 2SD to predict any delay in children 12-24 months    | 4/4/332<br>53A, 55A, 56,<br>68A                     | 0.70 (0.58,<br>0.79)<br>I <sup>2</sup> =48%   | 0.77 (0.69,<br>0.83)<br>I <sup>2</sup> =0%    | 3.0 (2.1 4.2)  | 0.40 (0.28<br>0.56)  | 8 (4, 14)  | 0.78 (0.75,<br>0.82) |
| ASQ 2SD to predict severe delay in children 12-24 months | 4/4/314<br>45A, 55B, 58B,<br>68B                    | 0.85 (0.68,<br>0.94)<br>I <sup>2</sup> =69%   | 0.76 (0.63<br>0.85)<br>I <sup>2</sup> =79%    | 3.6 (2.1 6.1)  | 0.20 (0.08<br>0.49)  | 18 (5, 71) | 0.88 (0.84<br>0.90)  |
| ASQ 2SD to predict any delay in children ≥24 months      | 6/6/1153<br>4, 41A, 47A,<br>53B, 58A, 63C           | 0.73 (0.55,<br>0.86)<br>I <sup>2</sup> =79%   | 0.79 (0.66<br>0.88)<br>I <sup>2</sup> =95%    | 3.5 (2.4 5.3)  | 0.34 (0.21<br>0.56)  | 10 (6,18)  | 0.83 (0.80,<br>0.86) |

|                                                                               |                                                      |                                                      |                                                        |                       |                          |                    |                          |
|-------------------------------------------------------------------------------|------------------------------------------------------|------------------------------------------------------|--------------------------------------------------------|-----------------------|--------------------------|--------------------|--------------------------|
| <b>ASQ 2SD to predict severe delay in children <math>\geq</math>24 months</b> | <b>4/4/439</b><br><b>34, 41B, 45B,</b><br><b>47B</b> | <b>0.94 (0.75, 0.99)</b><br><b>I<sup>2</sup>=15%</b> | <b>0.76 (0.68, 0.82)</b><br><b>I<sup>2</sup>=61.3%</b> | <b>3.8 (2.7, 5.4)</b> | <b>0.08 (0.01, 0.39)</b> | <b>51 (8, 328)</b> | <b>0.88 (0.85, 0.91)</b> |
|-------------------------------------------------------------------------------|------------------------------------------------------|------------------------------------------------------|--------------------------------------------------------|-----------------------|--------------------------|--------------------|--------------------------|

**ASQ result**      **Developmental delay present**      **Developmental delay absent**      **Total**  
**Failed TP**      **FP**

**Passed FN**      **TN**

**Total P**      **S-P**      **S (No. of all children)**

**TP = Sensitivity\*P; TN = Specificity\*(S - P); FP = (S-P)-TN; FN = P-TP.**
